1 **Heat shock factor 5 is conserved in vertebrates and essential for**  
2 **spermatogenesis in zebrafish**

3

4 Jolly M. Saju<sup>1</sup>, Mohammad Sorowar Hossain<sup>1,2#</sup>, Woei Chang Liew<sup>1</sup>, Ajay  
5 Pradhan<sup>3</sup>, Natascha May Thevasagayam<sup>1</sup>, Amit Anand<sup>4+</sup>, Per-Erik Olsson<sup>3+</sup> and  
6 László Orbán<sup>1,5,6+</sup>,

7

8 1) Reproductive Genomics Group, Temasek Life Sciences Laboratory,  
9 Singapore

10 2) Department of Biological Sciences, National University of Singapore,  
11 Singapore

12 3) Biology, The Life Science Center, School of Science and Technology, Örebro  
13 University, Örebro, Sweden

14 4) Bioimaging and Biocomputing, Temasek Life Sciences Laboratory,  
15 Singapore

16 5) Department of Animal Sciences, Georgikon Faculty, University of Pannonia,  
17 Keszthely, Hungary

18 6) Centre for Comparative Genomics, Murdoch University, Perth, Australia

19

20 # Present address: Biotech Division, Incepta Pharmaceuticals Ltd, Dhaka,  
21 Bangladesh

22

23 Key words: Hsf5, fish sex; gonad differentiation; spermatogenesis; CRISPR/Cas9

24

25 + *Addresses for correspondence*: László Orbán, Department of Animal Sciences,  
26 Georgikon Faculty, Pannon University, Keszthely, Hungary, Tel: +36 30 516  
27 6656, E-mail: [orban@georgikon.hu](mailto:orban@georgikon.hu); Per-Erik Olsson, Biology, The Life Science  
28 Center, School of Science and Technology, Örebro University, Örebro, Sweden,  
29 Tel: +46 19 301244, Email: [Per-Erik.Olsson@oru.se](mailto:Per-Erik.Olsson@oru.se); Amit Anand, Bioimaging  
30 and Biocomputing, Temasek Life Sciences Laboratory, 1 Research Link, The  
31 NUS, Singapore 117604; Tel: 65-6872-8406; E-mail: [amit@tll.org.sg](mailto:amit@tll.org.sg).

32

33

34 **Abstract**

35 Heat shock factors (Hsfs) are transcription factors that regulate response to heat  
36 shock and to variety of other environmental and physiological stimuli. Four HSFs  
37 (HSF1-4) known in vertebrates till date, perform a wide variety of functions from  
38 mediating heat shock response to development and gametogenesis. Here, we  
39 describe a new yet conserved member of HSF family, Hsf5, which likely  
40 exclusively functions for spermatogenesis. The *hsf5* is predominantly expressed  
41 in developing testicular tissues, in comparison to wider expression reported for  
42 other HSFs. HSF5 loss causes male sterility due to drastically reduced sperm  
43 count, and severe abnormalities in remaining few spermatozoa. While *hsf5*  
44 mutant female did not show any abnormality. We show that Hsf5 is required for  
45 progression through meiotic prophase 1 during spermatogenesis. The *hsf5*  
46 mutants indeed show misregulation of a substantial number of genes regulating  
47 cell cycle, DNA-damage repair, apoptosis and cytoskeleton proteins. We also  
48 show that Hsf5 physically binds to majority of these differentially expressed  
49 genes, suggesting its direct role in regulating the expression of many genes  
50 important for spermatogenesis.

51

52

## 53 **Introduction**

54 Heat shock transcription factors (Hsfs) are involved in the differentiation,  
55 development, reproduction and stress-induced adaptation by regulating  
56 temperature-controlled heat shock protein (*hsp*) genes and other, non-hsp  
57 genes as well ((1, 2); (for the complete list of genes analyzed in the study see  
58 **(Supplementary Table 1A)**). Hsps are molecular chaperones that maintain the  
59 cellular homeostasis and promote survival (3, 4). Multiple Hsfs in plants and  
60 vertebrates appear to mediate a wide array of responses to versatile forms of  
61 physiological and environmental stimuli (5).

62 Four members of the Hsf family have been identified and characterized in  
63 vertebrates prior to this study (reviews: (1, 6, 7)). Three of them (Hsf1, Hsf2 and  
64 Hsf4) are conserved in all vertebrate groups, whereas the fourth (Hsf3) is found  
65 in mouse, birds, lizards and frogs. The canonical Hsf1 and Hsf3 have been shown  
66 to mediate stress-induced Hsp expression in response to various environmental  
67 stressors such as elevated temperatures and cadmium sulfate, or exposures to  
68 proteasome inhibitors (8-10). In the case of Hsf1, the stress responses are  
69 generally manifested by the ability of this transcription factor to exhibit inducible  
70 DNA binding activity, nuclear localization and oligomerization (11). Mouse cells  
71 with inactivated Hsf1 have been shown to be unresponsive to stress-induced

72 *Hsp* gene expression (12). Hsf1-knockout mice were found to show enhanced  
73 effects upon treatments with cadmium (13) and bacterial endotoxins (12).

74 On the other hand, Hsf2 and Hsf4 were not stress-responsive; their expression  
75 varied strongly during differentiation and development. In Hsf2-knockout mice,  
76 microarray-based transcriptomic analysis of embryos and testis – in comparison  
77 to controls - could not detect any differentially expressed (DE) genes from the  
78 HSF/chaperone family (14). Hsf4 was found to be involved in lens development  
79 in the rat (15). Immunohistochemical analysis of human and mouse testis  
80 sections with an anti-Hsf5 antibody showed highest staining intensity in  
81 spermatocytes followed by spermatids (16). In vertebrates, HSFs play a crucial  
82 role in the maintenance of the reproductive function, mainly during  
83 spermatogenesis (1). In *Drosophila*, there is only a single Hsf, which regulates  
84 heat-shock induced gene expression, and it is also essential for larval  
85 development and oogenesis (17).

86 Zebrafish (*Danio rerio*, *Cyprinidae*) is an important vertebrate model organism,  
87 which has helped to answer important biological questions related to  
88 development, genetics and diseases (18-20). This small freshwater species offers  
89 several advantages over other models due to its small size, short generation  
90 time, transparent embryonic development and availability of relatively large

91 number of eggs on a weekly basis. Zebrafish is also suitable for high throughput  
92 experiments and large-scale mutagenesis for genetic studies. Prior to this study,  
93 three heat shock factors, namely Hsf1, Hsf2 and Hsf4 have been isolated and  
94 characterized from zebrafish (14, 21, 22).

95 In order to understand zebrafish reproduction at the molecular level, others and  
96 we have performed comparative expression analyses of male vs. female gonads  
97 at several different developmental stages from 21 days post-fertilization (dpf) to  
98 adults (23-25). Array-based transcriptomic studies performed in our lab earlier  
99 on adult gonads identified a number of novel genes with gonad-specific (or  
100 gonad-enhanced) expression (23, 25). One of these gonad-enhanced novel  
101 genes was *heat shock factor 5 (hsf5)*, which is a new member of the Hsf family.  
102 We cloned the full-length cDNA of *hsf5* from zebrafish and characterized its  
103 expression in embryos, developing gonads and adult tissues. In adult zebrafish,  
104 the gene is expressed in several adult organs, with the testis showing higher  
105 transcript levels than other organs, including the ovary, and a short transcript  
106 variant specific to testis. We have created zebrafish mutants of *hsf5* by  
107 CRISPR/Cas9 technology (26), and used them for basic functional  
108 characterization of the gene product. Testes of adult *hsf5*<sup>-/-</sup> males were primarily  
109 dominated by spermatocytes with very few spermatozoa remaining. A detailed  
110 analysis of mutants revealed that *hsf5* loss-of-function results in failure of

111 progression of meiotic prophase 1, through misregulation of cell cycle, meiosis  
112 and DNA repair. The head size of mutant spermatozoa has increased compared  
113 to control and many had distorted or missing flagella. While all *hsf5*<sup>-/-</sup> males were  
114 infertile, *hsf5*<sup>-/-</sup> and *hsf5*<sup>+/-</sup> females as well as *hsf5*<sup>+/-</sup> males exhibited normal  
115 gonadal appearance and fertility. To the best of our knowledge, this is the first  
116 functional characterization of Hsf5 from any of the vertebrate species and the  
117 first molecular insight for its role in zebrafish spermatogenesis.

118

119 **Results**

120 ***Identification and cloning of Hsf5, a new heat shock transcription***

121 ***factor***

122 We identified *hsf5* initially as an EST with enhanced expression in zebrafish testis  
123 from a normalized adult testis cDNA library (23). Subsequent RACE analysis and  
124 sequence comparison with other ESTs led to identification of full-length 1.7 kb  
125 transcript (FJ969446, NM\_001089476).

126 Mapping of the full-length cDNA to the latest genome assembly (Genome  
127 Reference Consortium, GRCz11; released in May 2017) revealed that the  
128 genomic locus consisted of six exons spanning a region of over 20 kb on  
129 Chromosome 5 (3,094,980 - 3,118,313 bp). Bioinformatic analysis of the  
130 predicted protein revealed that the N-terminal region (between the 19<sup>th</sup> and  
131 119<sup>th</sup> amino acids) of the protein contains a helix-turn-helix DNA binding domain  
132 (DBD) that is the most conserved functional domain in HSFs across vertebrates  
133 **(Fig. 1A)**. The DBD of the new gene showed 37-39% identity with those of  
134 other zebrafish Hsfs **(Supplementary Table 1D)**.

135 Orthologs were identified in human (NP\_001073908.2), mouse  
136 (NP\_001038992.1), chicken (XP\_003642431.2), python (XP\_007429104),  
137 *Xenopus* (NP\_001107312.1) and guppy (XP\_008426339), thus we propose that



138 this protein is likely to be conserved in most vertebrates. On the phylogenetic  
139 tree, all previously described Hsfs were grouped into four separate clusters  
140 (Hsf1-4), whereas the new gene and its presumed vertebrate orthologs have  
141 formed a new branch (**Fig. 1B**). These data confirm that this is the latest, novel  
142 member of the heat shock factor family and is classified as Hsf5.

143 In addition to the DBD domain, we could not find other domains in zebrafish  
144 Hsf5; the Neuregulin domain found in *Xenopus* Hsf5, and the heptad repeat A/B  
145 and heptad repeat C (HR-C) domains present in the other Hsfs were not present  
146 (**Fig. 1C**). Zebrafish Hsf5 shares structural similarities with its orthologs from frog,  
147 chicken and human HSF5, including the lack of HR-A/B and HR-C domain. This  
148 indicates that Hsf5 monomers and dimers may not be able to form trimers, bind  
149 to a typical heat shock element or induce heat-shock response. We examined  
150 experimentally whether *hsf5* expression is altered upon heat shock as observed  
151 for many other heat shock response proteins. The expression level of *hsf5* did  
152 not increase upon heat shock in adult testis, whereas transcript levels of *hsp70*  
153 showed a significant up-regulation, suggesting that Hsf5 may not be directly  
154 involved in heat shock response (**Supplementary Fig 2B-C**). The total number of  
155 heat shock factors in zebrafish now stands at four: Hsf1 (27), Hsf2 (22), Hsf4 (21)  
156 and Hsf5 (this publication).

157

158 ***Hsf5* shows sexually dimorphic expression**

159 The *hsf5* transcript was maternally deposited in zebrafish oocytes and the first  
160 sign of its zygotic expression was observed at mid-blastula transition stage  
161 **(Supplementary Fig 3A)**. In adults, *hsf5* expression was significantly higher in  
162 the testis than other organs, including the ovary **(Supplementary Fig 3B)**.

163 The male-specific expression pattern of *hsf5* was established during the  
164 development. In comparison to two early testicular markers, *amh* and *nr5a1a*,  
165 and ovarian marker *cyp19a1a*, which showed up-regulated expression in  
166 respective gonads from 30 dpf (28, 29), *hsf5* expression remained low in  
167 developing gonads from both sexes until 35 dpf **(Supplementary Fig 4)**. The  
168 *hsf5* expression levels increased significantly in testis from 35 dpf, while its  
169 expression at low levels continued in all other tissues, including ovaries, beyond  
170 that timepoint **(Supplementary Fig 4D, 5A)**. The above expression profile of  
171 *hsf5* suggests that the protein likely functions in the downstream processes of  
172 the gonadal transformation towards the maturation of testis.

173 RT-PCR and sequencing of full-length *hsf5* revealed the presence of an  
174 additional, shorter transcript variant (*hsf5\_tv2*) in testis, but not in the ovary  
175 **(Supplementary Fig 5A)**. The expression level of the short variant was

176 substantially lower than that of the long one (*hsf5\_tv1*). Sequence comparison  
177 revealed that the shorter variant lacked the third exon, resulting in the reduction  
178 of coding region to 1008 bp from 1251 bp of the long one (**Supplementary Fig**  
179 **5B**).

180

### 181 **Generation of Hsf5 mutants in zebrafish using CRISPR-Cas9**

182 First, we tried to ablate Hsf5 function by MO-based knockdown; when tested in  
183 embryos, the MO-injected samples did not show any specific phenotype  
184 different from mock-injected controls (**Supplementary material S12**). Similarly,  
185 none of the heat or chemical treatments on testicular explants yielded any  
186 significant change in the expression level of *hsf5* (**Supplementary material S12**).  
187 Therefore, we decided to generate loss-of-function mutants by CRISPR-Cas9  
188 technology.

189 Altogether, 16 founders have been validated through sequencing of the  
190 targeted exon (exon #2). Ten of them were outcrossed with WT partners to  
191 generate F1 offspring (**Supplementary Fig 6**) and heterozygous mutants were  
192 identified by fluorescent PCR with primers flanking the deletion site (see  
193 Materials and Methods). Heterozygous mutant siblings were crossed to generate  
194 the F2 progenies and a typical Mendelian segregation was observed. Three  
195 mutant lines were selected for downstream analysis and were named as Hsf5<sup>sg40</sup>

196 Hsf5<sup>sg41</sup> and Hsf5<sup>sg42</sup> as per ZFIN zebrafish nomenclature guidelines. Each line  
197 carried a different mutation; a 5bp and 7bp deletion and a 25 bp insertion,  
198 respectively, at the expected site in exon #2 coding for DNA binding  
199 domain(DBD). At protein level all three selected mutations in *hsf5* gene caused  
200 a frameshift leading to a premature stop codon, generating truncated proteins  
201 **(Fig. 2A-B)**. Since these mutations result in early termination of *hsf5*, in the  
202 DNA binding domain, we speculate that if the truncated Hsf5 is expressed in  
203 mutants, its function will be drastically affected. From here onwards, we refer to  
204 all these mutant alleles collectively as *hsf5*<sup>-/-</sup>.

205 Homozygous mutants carrying a 7bp deletion (labeled as Hsf5<sup>sg41</sup> in **Fig. 2A**)  
206 were used for Western blot, histology, SEM and RNAseq studies. Western blot  
207 analysis with anti-Hsf5 antibody, in Hsf5<sup>sg40</sup> and Hsf5<sup>sg41</sup> could not detect any  
208 Hsf5 protein confirming the loss of functional, full length Hsf5 **(Fig. 2C)**. To  
209 examine the role of *hsf5* in heat shock response, we performed heat treatment  
210 on the *hsf5* mutants. Expression of *hsp70* in the *hsf5* mutants was comparable to  
211 that in the WT heat exposed individuals **(Supplementary Fig 2B)**. *hsp70*  
212 induction in *hsf5* mutants suggests that Hsf5 is unlikely to play a direct role in  
213 heat shock response **(Supplementary Fig 2C)**.

214 3.4 Hsf5 is predominantly expressed in spermatocytes:

215 Immunostaining revealed abundant Hsf5 expression in testis (**Fig. 3A**). Hsf5  
216 expression was predominantly observed in spermatogonia and primary  
217 spermatocytes, whereas its expression in spermatids or spermatozoa was  
218 significantly low (**Fig. 3B**). We compared the localization of Hsf5 with that of a  
219 known primary spermatocyte marker, Sycp3 and found that both share similar  
220 localization patterns in spermatocytes (**Fig. 3C-D**). Expectedly,  
221 immunostaining and western blotting showed that Hsf5 expression in the ovary  
222 was much lower (**Fig. 3F, Supplementary Fig 2A**) than that in the testis. A  
223 closer examination of Hsf5 localization in testis revealed that Hsf5 is also  
224 localized as foci in the nucleus, while bulk of Hsf5 signal was outside of nucleus  
225 (**Fig. 3 G-H**).

226

227 ***Hsf5 is required for proper spermatogenesis and fertility in***  
228 ***males***

229 When crossed with WT partners, homozygous (*hsf5*<sup>-/-</sup>) and heterozygous (*hsf5*<sup>+/-</sup>)  
230 females as well as heterozygous males produced viable offspring, whereas  
231 homozygous mutant males failed to generate any viable offspring even after  
232 multiple trials. When embryos from the latter crosses were examined under light

233 microscope, they exhibited a substantial delay in their early development and  
234 eventual lethality before the age of one dpf (**Supplementary Fig 7**).

235 Infertility in homozygous male mutants prompted us to perform a histological  
236 comparison of wild type and *hsf5*<sup>-/-</sup> mutant testes. Expectedly, spermatids and  
237 well-developed lumina filled with spermatozoa could be observed in the wild  
238 type (**Fig. 4A**), whereas the *hsf5*<sup>-/-</sup> mutant testis exhibited a drastic loss of  
239 spermatozoa (**Fig. 4B**). A quantitative comparison of cell types between the  
240 mutant and WT testes revealed a significant increase in the number of primary  
241 spermatocytes and drastic reduction of spermatozoa in *hsf5*<sup>-/-</sup> mutant testis (**Fig.**  
242 **4C**), whereas the number of spermatogonia was comparable. Analysis of *hsf5*<sup>-/-</sup>  
243 semen smear under light microscope showed a drastic reduction in sperm  
244 counts in the *hsf5* mutants compared to that in the WT (**Fig. 4D**). The *hsf5*  
245 mutants also exhibited lower sperm motility in mutants than those of wild types  
246 (data not shown). Briefly, spermatogonia are the largest germ cells with large  
247 nucleus and poorly condensed chromatin, primary spermatocytes are  
248 characterised by the coarse chromatin strands and bouquet/umbrella  
249 configuration of chromosomes, and spermatid/spermatozoa are dark round  
250 nuclei with minimal or no cytoplasm counted together as one group (**Fig. 4E-**  
251 **G**).

252 Next, we examined the sperm morphology in detail, using scanning electron  
253 microscope. The results revealed a high proportion of grossly enlarged sperm  
254 heads in the *hsf5*<sup>-/-</sup> mutant compared to controls (**Fig. 4H-K**). Mutant sperm  
255 cells appeared clustered together with crenate arrangement of cytoplasmic  
256 membrane. The flagella were either too short or absent from many of the  
257 mutant sperm cells compared to wild type (**Fig. 4H-K**).

258 A detailed analysis of *hsf5*<sup>-/-</sup> spermatozoa with transmission electron microscopy  
259 revealed irregular shape and disruption of cytoplasmic membrane at various  
260 regions around the nucleus along with intense vacuolization in most sperm  
261 heads (91%; n=103; **Fig. 5A-D**). Cross section of flagellar axoneme of *hsf5*<sup>-/-</sup>  
262 mutant spermatozoa showed severe deformity in the arrangement of  
263 microtubules. Unlike wild type axoneme, which has a typical '9+2' pattern for  
264 microtubule arrangement (30), majority of *hsf5*<sup>-/-</sup> spermatozoa showed severe  
265 structural defects. Some of *hsf5*<sup>-/-</sup> spermatozoa had a single central microtubule  
266 only, while others showed complete lack of central tubules and the rest of the  
267 peripheral duplet microtubules were irregularly arranged (85%; n=117; **Fig. 5E-**  
268 **H**). Longitudinal sections through the flagella also revealed lack of central  
269 doublet microtubules and irregular arrangement of central and peripheral  
270 microtubules in most of the *hsf5*<sup>-/-</sup> sperms (**Fig. 5I-J**; see **Fig. 5K** for relative  
271 frequency of these defects).

272 Loss of spermatozoa, reduction in sperm counts and defects in sperm shape and  
273 structure in *hsf5*<sup>-/-</sup> mutants suggest that Hsf5 is very important for  
274 spermatogenesis.

275

276 **Spermatogenesis in *hsf5*<sup>-/-</sup> mutant testes appears to be arrested**  
277 **during meiotic division**

278 Increase in the number of primary spermatocytes and loss of spermatozoa in  
279 *hsf5*<sup>-/-</sup> mutants prompted us to examine primary spermatocytes at different  
280 stages of meiosis. We performed immunostaining with anti-Hsf5 antibody and  
281 anti-Sycp3, a well-known marker for primary spermatocytes (31), to compare  
282 meiotic prophase-1 progression between *hsf5*<sup>-/-</sup> mutant and WT testes.

283

284 *hsf5*<sup>-/-</sup> mutant testes showed a marked increase in the clusters of Sycp3-positive  
285 cells, confirming accumulation of primary spermatocytes in comparison to WT,  
286 which was suggested by histological analysis (**Fig. 6A&B, Fig 4A-D**).

287 Detailed analysis of the localization of Sycp3 also allowed us to differentiate  
288 between different stages of meiotic prophase in primary spermatocytes, namely,  
289 pre-leptotene, leptotene and zygotene/pachytene. In agreement with previously  
290 published reports (32), at preleptotene stage, Sycp3 appeared as a small  
291 particle at one side of cell (**Fig. 6E**). At leptotene stage, Sycp3 staining



292 seemed to highlight the bouquet shaped chromosomal arrangement (**Fig. 6F**),  
293 whereas at zygotene/pachytene stage, Sycp3 localization appeared reticulate,  
294 staining condensed chromosomes (**Fig. 6G**). We compared the numbers of cells  
295 in these stages between the WT and *hsf5*<sup>-/-</sup> mutant testes, from randomly  
296 selected regions of equal area. *hsf5*<sup>-/-</sup> mutant testes showed comparatively lower  
297 number of cells at preleptotene stage, and significantly higher ones in the  
298 subsequent leptotene and zygotene/pachytene stages in comparison to WT  
299 testes (**Fig. 6H**). In addition, the size of the cells at the above stages, was also  
300 greater in *hsf5*<sup>-/-</sup> testes in comparison to that in WT testes (**Supplementary Fig**  
301 **8**), which might have resulted from some defects in cell division.

302 The reduction in the number of post-meiotic cells and their aberrant shape,  
303 suggested by the histology analysis, could have resulted from programmed cell  
304 death. Indeed, fluorescence-based TUNNEL assay showed significantly higher  
305 number of apoptotic cells (both spermatocytes and spermatozoa) in mutants  
306 while only a few such cells were observed in WT testis (**Fig. 6C-D**).

307 Accumulation of the cells during meiotic leptotene and zygotene/pachytene  
308 stages with loss in the cells in post-meiotic stages, suggests that Hsf5 is required  
309 for proper progression during meiotic prophase-I in spermatogenesis.

310

311 **Hsf5 has a potentially important role in regulating cell cycle and**  
312 **apoptosis**

313 Comparative transcriptome analysis of adult testes from the *hsf5*<sup>-/-</sup> mutant and  
314 wild type individuals revealed that 28% (3,592/12,772) of the genes tested were  
315 differentially expressed. Of these, 2,804 were up-regulated and 788 were down-  
316 regulated in the mutant with a *p*-value <0.05 (**Supplementary Table 1E**). A  
317 principal component analysis (PCA) of the sequencing data showed that the  
318 transcriptome of the *hsf5*<sup>-/-</sup> zebrafish gonad is significantly different from that of  
319 WT (**Fig. 7A**). The expression of a few *hsp* genes, such as *hsp90ab1*, *hsp70*,  
320 *hspa4a*, *hspa8*, *hspa14* and some members of the *hsp40* family, showed  
321 marginal up-regulation in mutants, whereas *hsp40c6* and *hspb8* were the only  
322 members with slightly down-regulated transcript levels (**Supplementary**  
323 **Table 1E**).

324 GO analysis of differentially expressed genes showed enrichment of genes for  
325 the following GO terms: 'Regulation of cell cycle', 'Regulation of cell death',  
326 'Chromatin organization', 'Sister chromatid segregation', 'Double strand break  
327 repair', 'Microtubule based movement', 'Intracellular transport' and 'ATP  
328 binding', suggesting Hsf5 may be an important regulator of cell cycle during  
329 spermatogenesis (**Supplementary Table 1F**).

330 Hsf5 loss-of-function resulted in misregulation of 13-38% genes categorized in  
331 multiple DNA-repair pathways, including 'Mismatch repair', 'Nucleotide excision  
332 repair', 'Base excision repair' and 'Non-homologous end-joining' pathways. In  
333 addition, nearly 30% of 'Cell cycle' pathway genes (**Supplementary Table**  
334 **1G**), including cyclins, which play an important role in meiosis (cyclins A1, B1,  
335 B3, D2 and E2; for review see: (33, 34)), were also differentially expressed.

336 HSFs are known to contain DBD which, albeit their nuclear localization is  
337 observed upon stimulus. A high-resolution imaging showed Hsf5 localization in  
338 the nucleus as small speckles in wild type cells (**Fig. 3G, H**). Therefore, we  
339 examined DNA binding of Hsf5 using ChIP-Seq. The results revealed a total of  
340 7,651 peaks with  $p$ -value  $<0.05$  and  $>2.5$ -fold enrichment of peak height in two  
341 independent biological replicates compared to input DNA control  
342 (**Supplementary Table 1H**). Nearly 60% of Hsf5 peaks were in the genic  
343 regions, mapping to 2,014 genes in the gene bodies, only very few of them  
344 were in the promoter region (**Fig. 7B**). These 2,014 genes were used for  
345 investigating the potential role of Hsf5 in the process of spermatogenesis by  
346 intersecting with DE genes between *hsf5*<sup>-/-</sup> vs. WT. Many of these Hsf5-bound  
347 genes were differentially expressed, among these Hsf5 enrichment was more  
348 than 4-fold for 609 DETs (**Fig. 7D; Supplementary Table 1I**). Of these, 489  
349 (80.3%) were up-regulated and the remaining 120 (19.7%) were down-regulated

350 in *hsf5*<sup>-/-</sup> mutant males revealing a tight correlation between the genes Hsf5  
351 bound as well as up-regulated upon Hsf5 depletion, suggesting that Hsf5 may  
352 function primarily as a transcriptional repressor.

353 KEGG analysis of Hsf5-bound, differentially expressed genes (*p*-value <0.05 and  
354 2.5-fold or higher enrichment of peak) revealed that a substantial number of  
355 these genes were categorized in pathways 'Cell cycle', 'Meiosis', 'Apoptosis',  
356 'DNA repair' and 'Wnt signaling' (**Fig. 7E; SupplementaryTable 1J** for more  
357 details). This suggests that Hsf5 directly regulates the genes required for proper  
358 cell division and also explains the meiotic progression failure in the *hsf5*<sup>-/-</sup>  
359 mutants.

360

361 **Discussion**

362

363 ***Hsf5, a new, conserved heat shock transcription factor is essential for***  
364 ***spermatogenesis in zebrafish***

365 Here, we report identification and functional characterization of a novel heat  
366 shock factor, Hsf5 from zebrafish. Based on the presence of Hsf5 homologs in  
367 more than 30 species (data not shown), including several mammals, chicken and  
368 *Xenopus*, Hsf5 appears to be conserved across the whole vertebrate clade. Our  
369 study describes the functional analysis of this new member of Hsf family, in a  
370 vertebrate system.

371 A remarkable feature about Hsf5 seems to be its exclusive function for  
372 spermatogenesis in zebrafish, indicated by its expression pattern and detailed  
373 analysis of spermatogenesis in *hsf* mutants. Hsf5 expression patterns seem to be  
374 conserved among humans and rats too, suggesting its similar function in other  
375 mammals (16).

376 Other orthologues in mouse, *Hsf1* and *Hsf2*, are also transiently expressed in  
377 spermatocytes and spermatids (35, 36). Male *Hsf2*-null mice developed smaller  
378 testes with abnormal seminiferous tubules resulting in reduced fertility (14). A  
379 double knockout of both *Hsf1* and *Hsf2* in male mice resulted in a more severe  
380 gonadal phenotype that included infertility due to abnormal sperm shape and

381 reduced sperm numbers (35, 37), similar to what we observed in our *hsf5*<sup>-/-</sup>  
382 zebrafish males, suggesting Hsfs play an important role in spermatogenesis.

383

#### 384 ***Loss of Hsf5 disrupts meiotic progression in spermatocytes***

385 Hsf5 protein localization was predominantly observed in the primary  
386 spermatocytes, similarly to Sycp3 ((31); **(Fig. 6A-B)**). The Hsf5 signal was  
387 strongest at the cytoplasmic bridges, which interconnect the spermatocytes. In  
388 mice and *Drosophila*, these structures were suggested to function as channels to  
389 transport gene products (38).

390 The observed accumulation of primary spermatocytes in the leptotene and  
391 zygotene/pachytene stages in zebrafish, strongly suggests that Hsf5 plays a vital  
392 role in the progression of meiotic prophase 1. Accumulation might occur from a  
393 delay in the cell cycle due to defects, whereas lower number of cells in  
394 preleptotene stage in *hsf5*<sup>-/-</sup> mutant might be the result of a feedback  
395 mechanism, where accumulated cells in later states send a signal that inhibits  
396 the entry of mature spermatogonia into meiotic stage. Indeed, misregulation of  
397 some genes likely explains our observation. For example, follicle stimulating  
398 hormone (Fsh) supports entry into meiosis and survival via the intrinsic & the  
399 extrinsic apoptotic pathways in rodents (39), the expression level of its receptor

400 (*fshr*) showed a two-fold down-regulation in the *hsf5*<sup>-/-</sup> mutants. One of the  
401 genes with significantly down-regulated expression level in the *hsf5*<sup>-/-</sup> zebrafish  
402 testis is mediator complex subunit 1 (*med1*). In mouse, MED1 is required for  
403 meiotic progression, as Med1 knockout male mice showed reduced number of  
404 testicular cells at preleptotene stage and accumulation of spermatocytes at  
405 pachytene stage (40). The above results validate our observations and  
406 strengthen the role of Hsf5 in proper meiotic progression.

407

408 ***The expression level of several genes associated with cell cycle regulation or***  
409 ***DNA repair is altered in *hsf5*<sup>-/-</sup> mutant testes***

410 We observed that several genes regulating cell cycle, apoptosis and DNA  
411 damage repair, were misregulated in *hsf5*<sup>-/-</sup> mutants suggesting that Hsf5 is an  
412 upstream regulator of meiosis. Importantly, several cyclin genes such as *cyclin*  
413 *A1*, *cyclin D2*, *cyclin Y* and *cyclin K* that regulate meiosis showed down-  
414 regulated expression in *hsf5*<sup>-/-</sup> mutants. Cyclin A1 (*ccna1*), is most abundantly  
415 expressed in spermatocytes in the mouse and its deficiency causes meiotic  
416 arrest at late meiotic prophase and undergo apoptosis (41, 42). In mice, down-  
417 regulation of *cyclin B3* (*ccnb3*) expression is necessary at the zygotene-  
418 pachytene transition for the normal progression of spermatogenesis (43). The

419 expression of cyclin B3 was up-regulated in our mutant zebrafish males leading  
420 to abnormal spermatogenesis. E-type and D-type cyclins also play an important  
421 role in prophase 1 of meiosis in mice. Down-regulated expression of cyclins  
422 involved in spermatogenesis provides a glimpse of molecular details that  
423 underlie the meiotic progression failure in *hsf5*<sup>-/-</sup> mutants.

424 In addition, we also noticed a down-regulation of 25 members of PIM kinases,  
425 **(Supplementary Table 1E)**. These proteins belong to CAMK group of kinases,  
426 which regulate cell cycle and growth. Knockdown or inhibition of PIM-1 was  
427 correlated to increased apoptosis, induction of heat-shock family proteins (44)  
428 and inhibition of nonhomologous DNA-end-joining (NHEJ) repair activity in  
429 humans.

430 Hsf5 loss-of-function in zebrafish caused misregulation of up to a third of genes  
431 categorized in 'Mismatch repair', 'Nucleotide excision repair' and 'Base excision  
432 repair' pathways. DNA repair is a basic process essential for the maintenance of  
433 genomic integrity by playing a critical role in mitosis and meiotic recombination  
434 and chromosome pairing (45).

435 The cAMP responsive element modulator (*crema*) is down-regulated in *hsf5*<sup>-/-</sup>  
436 mutant testes. Loss of function of its mouse orthologue CREM, leads to severe  
437 impairment of spermatogenesis and germ cell apoptosis. CREM is regulated by  
438 germ cell-specific kinesin, Kif17b. Thirteen members from *kif* family, including



439 *kif17*, were differentially expressed in our study suggesting that Crema might  
440 also play a role in zebrafish spermatogenesis.

441 The expression of several members of the regulatory factor X (*rfx*) family of  
442 transcription factors, such as *rfx7*, *rfx1a* and *rfxap*, was also up-regulated in *hsf5*<sup>-/-</sup>  
443 males. The RFX2 transcription factor is a master regulator of genes required for  
444 the haploid phase in mice and *Rfx2*<sup>-/-</sup> mice show complete male sterility (46).  
445 RFXs regulate intraflagellar transport (IFT) genes and RFX1 is reported to be  
446 essential for later stages of spermatogenesis (47). In our data, we also noticed  
447 enrichment of genes for GO terms ‘Sister chromatid segregation’ and ‘Double  
448 strand repair’ indicating the potential presence of a compensatory mechanism in  
449 *hsf5*<sup>-/-</sup> males. A similar mechanism has also been proposed earlier for human  
450 spermatogenesis (48).

451

452 ***Down-regulation of important cytoskeleton and motor proteins explain the***  
453 ***defects with sperm mobility and short tails in hsf5*<sup>-/-</sup> **mutant males****

454 Disruption of proper microtubules arrangement in the sperm axoneme is likely  
455 explained by misregulation of cytoskeletal and motor proteins. Axonemal  
456 dyneins are considered “arms” that are attached to each of the nine doublet  
457 microtubules (49). Our data showed reduced expression of *dnai1.2* in the  
458 mutant, whereas *dnai2a* and six members of the *dnah* gene family (*dnah1*,

459 *dnah5*, *dnah7l*, *dnah9*, *dnah9l* and *dnah10*) all showed up-regulated expression  
460 levels compared to WT. Misregulation of these genes have been reported in the  
461 sperm motility related disorders. In ciliary dyskinesia patients, abnormal  
462 assembly of DNAH7 was identified previously (50). Similarly, defects in human  
463 DNAI1 resulted in primary ciliary dyskinesia type 1 (CILD1) with abnormalities in  
464 the sperm flagellum and reduced fertility (51). Misregulation of cytoskeletal  
465 coding genes, such as *map1sb*, *saxo2*, *msat4* and *mapre2*, likely explains  
466 abnormal microtubule arrangement of axonemes in 85% of *hsf5*<sup>-/-</sup> mutant  
467 zebrafish spermatozoa. In addition, we also observed down-regulated  
468 expression of many tubulin genes, such as *tuba2*, *tubcd*, *atat1*, *tll1*, and *tll3*, in  
469 *hsf5*<sup>-/-</sup> mutant males.

470 Intraflagellar transport (*ift*) genes are essential for the bidirectional movement of  
471 substances within cilia and flagella as well as maintenance and assembly of these  
472 structures (52, 53). Over-expression of three *ift* genes (*ift20*, *ift80* and *ift172*)  
473 might have contributed to the abnormal flagella formation and sterility of *hsf5*<sup>-/-</sup>  
474 male fish. *Spag6*, an axoneme central apparatus protein, is essential for the  
475 function of ependymal cell cilia, sperm flagella and axoneme orientation. Many  
476 *Spag6*-deficient mice showed sterility because of sperm motility defects (54). In  
477 our study, *spag6* expression level was reduced in *hsf5*<sup>-/-</sup> mutants, whereas

478 *spag1b*, *spag7*, *spag9* and *spag16*, were all expressed at a higher level  
479 compared to WT.

480 Dynein axonemal assembly factor (Dnaaf) proteins are important for assembling  
481 axonemal dynein and stability of cilia and flagella (55-57) . In human patients  
482 lacking DNAAF2, both outer and inner dynein arms were partially or completely  
483 absent and sperm flagella were immotile (58). *hsf5*<sup>-/-</sup> zebrafish males also showed  
484 lower *dnaaf2* transcript levels than WT. Misregulation of these genes coding for  
485 cytoskeleton and motor proteins points to potential importance of Hsf5 in the  
486 control of genes associated with sperm mobility.

487 Hsf expression is mostly reported in the cytoplasm, the localization of Hsf1 and  
488 Hsf2 to stress granules in nuclei upon heat shock has been reported in humans  
489 (59, 60). Since Hsf5 loss of function did not result in major misregulation of *hsp*  
490 genes, it does not seem to function in the heat shock response, however, its  
491 nuclear accumulation as speckles, in primary spermatocytes, was visible.  
492 Remarkably, many genes with significant Hsf5 binding were misregulated in the  
493 *hsf5* mutants, suggesting its role in transcriptional regulation of those important  
494 genes. Hsf5 peaks in the gene bodies suggest, that it may not act as canonical  
495 transcriptional regulator, which bind to the promoter regions. Future analysis of  
496 epigenomic status of DEGs in Hsf5 mutants and Hsf5 interacting partners may  
497 reveal more about the mechanistic details of Hsf5 function.

498

## 499 **Materials and Methods**

### 500 ***Fish husbandry***

501 This study and all procedures were approved by Temasek Life Sciences  
502 Laboratory Institutional Animal Care and Use Committee (approval ID: TLL(F)-10-  
503 002) for experiments carried out at Temasek Life Sciences Laboratory (License  
504 for Animal Research Facility No. VR016) and Örebro University by Linköpings  
505 djurförsöksetiska nämnd (Linköpings Animal Care and Use Committee,  
506 Approval ID: 32-10) for experiments carried out at Örebro University (License for  
507 Animal Research Facility: No. 5.2.18-2863/13).

508

509 Zebrafish (*Danio rerio*, AB strain) were raised, maintained, and crossed  
510 according to the standard protocol (61). Samples of different stages of gonad  
511 development were collected using Tg(*ddx4:ddx4-egfp*) (formerly known as  
512 Tg(*vas:egfp*) transgenic zebrafish line (a generous gift from Dr. Lisbeth Oslen,  
513 SARS, Bergen, Norway). Fish were reared in AHAB recirculation systems (Aquatic  
514 Habitats, Apopka, FL, USA) at ambient temperature (26-28°C).

515

### 516 ***Identification of hsf5 and its two isoforms***

517 The expressed sequence tag (EST) with testis-enhanced expression was  
518 identified from our full-length, normalized adult testis cDNA library (23, 25). A  
519 BLASTn search with this sequence as a bait yielded seven other testis-derived  
520 ESTs from GenBank. The consensus sequence (1,581bp) was confirmed by RT-  
521 PCR (for the complete list of genes analyzed in the study and primers used for  
522 their amplification please see **(Supplementary Table 1B)**). To obtain the  
523 complete *hsf5* cDNA sequence, rapid amplifications of cDNA ends (RACE) were  
524 performed using RLM-RACE kit (Ambion). The amplified products were cloned  
525 into pGEM-T easy vector (Promega) and used for sequencing.

526 The coding region of zebrafish *hsf5* cDNA was amplified from various organs  
527 and different developmental stages using primers annealing to the ends of the  
528 cDNA and Qiagen 1 step RT-PCR kit. The products from PCR reactions were  
529 cloned into pGEM-T easy vector (Promega) and sequenced for verification.

530 The expression of *hsf5* transcript variants was analyzed by RT-PCR using a primer  
531 pair (*hsf5* FL) that amplified both *hsf5\_tv1* and *hsf5\_tv2*. The following PCR  
532 cycling conditions were used: initial denaturation step 95°C for 1 min, then 95°C  
533 for 30s, 60°C for 30s, 72°C for 30s; 36 cycles. *eef1a1l1* was used as a reference  
534 gene. Fully sequenced PCR products were compared to determine the  
535 difference between the two variants.

536

537 ***Bioinformatics and phylogenetic analysis of Hsf5***

538 The Hsf5 protein was analyzed using the following softwares: Conserved Domain  
539 Database (CDD), SMART (both available at: <http://expasy.org/>). The full-length  
540 amino acid sequence of Hsf orthologs were retrieved from GenBank  
541 **(Supplementary Table 1C)**. The sequences were aligned by the CLUSTAL  
542 OMEGA software (62). Estimation of molecular phylogeny was carried out by the  
543 neighbor-joining method with Poisson correction model as implemented in  
544 MEGA (Version 5) (63). Confidence in the phylogeny was assessed by bootstrap  
545 re-sampling of the data (1000) (64).

546

547 ***Sample collection and isolation of nucleic acids***

548 For the analysis of early gene expression, RNA was extracted from pooled  
549 zebrafish embryos (30 individuals/pool) collected at 3 days post-fertilization  
550 (dpf). Snap-frozen samples were stored at -80°C until use.

551 In order to investigate the expression of *hsf5* during gonad development,  
552 samples from the isolated gonads (20, 25, 30, 35 and 40 dpf) were collected  
553 from a total of six Tg(*ddx4:ddx4-egfp*) individuals for each time point.

554 Previously, our lab showed that those transgenic individuals that did not seem to  
555 show visually detectable Egfp signal during their early gonadal development  
556 (20-24 dpf) became exclusively males (65). Therefore, we considered such

557 individuals as presumptive males (four samples), whereas individuals with strong  
558 Egfp signal were considered as presumptive females (four samples). Individuals  
559 were sorted into these two categories as described earlier (65).

560 For spatial analysis of *hsf5* expression profiles in adult zebrafish, samples from  
561 nine different organs (testis, ovary, kidney, liver, brain, gut, gill, skin and eye)  
562 were collected from three individuals. For heat shock experiment, two groups  
563 were formed from adult male siblings. The first group was heat-treated for one  
564 hour at 37°C, whereas the second group was kept at ambient temperature (26-  
565 28°C). Testis samples were collected from three individuals in each group.

566 Total RNAs were extracted using either RNeasy RNA extraction kit (Qiagen) or  
567 TRIzol-LS reagent (Life Technologies) according to the manufacturer's  
568 instructions. RNA isolates were quantified using an ND-1000 spectrophotometer  
569 (NanoDrop). First-strand cDNA was synthesized under standard conditions using  
570 iScript cDNA synthesis kit (Bio-Rad) for the analysis of embryonic expression,  
571 whereas the Superscript First-strand Synthesis System (Invitrogen) using an oligo  
572 (dT)<sub>15</sub> primer (Roche) was used for adult organ samples.

573

#### 574 **Gene expression analyses**

575 The expression analyses of *hsf5* during early embryonic development, gonad  
576 development and in adult tissues were performed by using real-time

577 quantitative PCR (qPCR) using the iCycler iQ Real-time Detection system and  
578 SYBR Green chemistry (Bio-Rad). For the quantification of the transcripts, a  
579 standard curve with 10-fold serial dilution of testis cDNA was used. The 15  $\mu$ l  
580 qPCR mixture contained 7.5 $\mu$ l of 2 $\times$  iQ™ EVA Green Supermix, 0.5  $\mu$ l (5 mM) of  
581 each primer (these primers amplify both isoforms) and 1  $\mu$ l of cDNA. The  
582 following conditions were used: denaturation at 95 °C for 3 min, 40 cycles of  
583 denaturation at 95 °C for 30s, annealing at 60 °C for 30s and extension at 72 °C  
584 for 20s, followed by melt curve analysis (95 °C for 2 min and decrease by 0.1 °C  
585 at every 10s). Samples were assayed in triplicate and each experiment had at  
586 least three biological replicates. To normalize the expression, several  
587 housekeeping genes (including *actb1*, *rpl13*, and *eef1a111*) were assayed in  
588 order to identify genes with stable expression among the organs sampled and  
589 across different developmental stages. We found that both *rpl13* and *eef1a111*  
590 were suitable for the analysis of early developmental stages and adult zebrafish  
591 tissues, whereas for the study of developing gonads, *rpl13* worked well. In the  
592 present study, we used *eef1a111* for early developmental stages and adult  
593 tissues, whereas *rpl13* was used as a reference for the developing gonads.  
594 The efficiency of each reaction was calculated using PCR miner (66). The relative  
595 gene expression level was determined using the delta-CT method of  
596 normalizing gene expression by subtracting the average reference Ct value from



597 that of the average target and is presented as a log<sub>2</sub> of relative quantity (RQ) of  
598 target gene.

599

## 600 ***Immunohistochemistry***

601 For immunohistochemical (IHC) analyses, testes and ovaries from adult zebrafish  
602 (90 dpf) were isolated and fixed in 4% paraformaldehyde in PBS (pH 7.4; Sigma)  
603 for 2 hours (hrs) at room temperature (RT) and washed three times with PBS and  
604 equilibrated in graded sucrose series. Samples were frozen in tissue freezing  
605 media (Leica Biosystems), and 5-7  $\mu$ m sections were cut using a cryotome (Leica  
606 Biosystems). Nonspecific protein binding sites were blocked by 30 mins  
607 incubation in PBS-based blocking buffer containing 3 % BSA (Sigma) and 0.2 %  
608 Triton X. The sections were then incubated either with anti-Hsf5 or anti-Sycp3  
609 antibody for 16 hrs at 4 °C at 1:1000 and 1:400 dilutions, respectively, in PBS  
610 containing 1 % BSA and 0.1 % Triton X. Alexa Flour 488 anti-rabbit (Invitrogen)  
611 at 1:1000 dilutions were used as a secondary antibody to incubate for 2 hrs at  
612 RT followed by DAPI (Calbiochem) staining for 5 mins. The image was captured  
613 using an SP8 gSTED Confocal Laser Scanning Biological Microscope (Leica).  
614 Three randomly chosen images stained with Sycp3 from three biological  
615 replicates were used for counting different cell types in meiotic prophase stages.

616 To determine the meiotic stage of the primary spermatocytes we took  
617 advantage of Sycp3 antibody staining. The nuclei were stained by DAPI (red).

618

### 619 **Generation and screening of mutants**

620 Custom-designed guide RNA (gRNA) targeting the DNA Binding Domain at  
621 second exon of *hsf5* and recombinant Cas9 protein (*Streptococcus pyogenes*)  
622 were ordered from ToolGen Inc. gRNA was designed using CRISPR design tool  
623 (<http://crispr.mit.edu/>) and off-target analysis using RGEN Tools by Seoul  
624 University (<http://www.rgenome.net/cas-offinder>). Based on the above analysis  
625 result, a gRNA with no off-target effect was synthesized (**Supplementary Fig**  
626 **9**) for the position and sequence of the gRNA targeting site).

627 gRNA and Cas9 protein were co-injected into 350 one-cell stage zebrafish  
628 embryos in three separate experiments. Each embryo was injected with 2 nl of  
629 solution containing 12.5 ng/ml of sgRNA and 300 ng/ml of Cas9 protein.  
630 Injected embryos were grown to 60 dpf for fin clipping. A total of 57 F0 founder  
631 individuals were screened by fluorescent genotyping and 16 of them by T7E1  
632 assay (for typical results see **Supplementary Fig 10**) as well.

633 For screening, genomic DNA from the tail fin clip of three mpf (months post-  
634 fertilization) -old CRISPR/Cas9 injected zebrafish was isolated using genomic  
635 DNA extraction kit (Qiagen) following the manufacturer's protocol. The genomic

636 region surrounding the CRISPR target site was PCR amplified using primer pair  
637 'hsf5a' and cloned into pGEMT Easy vector (Promega). Positive clones were  
638 selected and the extracted plasmids were sequenced by Sanger method. For  
639 T7E1 assay, 200 ng PCR product per individual was subjected to a re-annealing  
640 process to enable heteroduplex formation: 95 °C for 10 min, 95 °C to 85 °C  
641 ramping at 2 °C/s, 85 °C to 25°C at 0.1 °C/s and holding at 25 °C for 1 min.  
642 After re-annealing, 5 units of T7 Endonuclease I (NEB) was added to the PCR  
643 products following the manufacturer's recommended protocol, and they were  
644 separated on 2% agarose gels in TBE buffer. Relative proportion of mutation  
645 was estimated by the formula of Indel % =  $100 \times (1 - \sqrt{1 - f_{cut}})$  as described in  
646 (67).

647 Ninety per cent of the tested founders contained mutations in the 2<sup>nd</sup> exon of  
648 the *hsf5* gene (for typical results see **Supplementary Fig 6**), the estimated  
649 percentage of mutation ranged from 17% to 54%. That exon was sequenced  
650 from sixteen selected F0 mutants to assess the number and type of mutations  
651 per individual and the results have shown the presence of several different  
652 insertions and/or deletions in each of these founder individuals (**Supplementary**  
653 **Fig 11**).

654

655 ***Propagation and genotyping of mutants***

656 F0 mosaic founders were raised to sexual maturity and crossed with wild-type  
657 (WT) partners to generate F1. The resulting embryos were grown to three mpf,  
658 genomic DNA was isolated from tail fin biopsies and subjected to genotyping to  
659 identify the mutants. Heterozygous mutants from F1 were crossed to generate  
660 F2 for subsequent analyses.

661 For genotyping, the forward primer of 'hsf5b' primer pair was labeled with FAM  
662 fluorescent dye on the 5' end and PCR was performed in a 25 ul volume to  
663 amplify a 267 bp fragment spanning the targeted region of the *hsf5* locus. PCR  
664 products were mixed with internal size standard, GeneScan 500 Rox (Applied  
665 Biosystems) and subjected to capillary electrophoresis using 3730xl DNA  
666 analyzer (ABI, Foster City, CA, USA). The genotypes of mutants were analyzed  
667 using Genemapper software (Version 5.0).

668 For fertility tests, twelve WT male and twelve WT female zebrafish were selected  
669 for pairwise crossing. The total number of eggs produced and survival rate at 24  
670 hpf was recorded for three to six rounds of breeding. After that, six and three  
671 WT females with consistent production of good quality eggs were selected to  
672 be paired with *hsf5*<sup>-/-</sup> and *hsf5*<sup>+/-</sup> male partners, respectively. Eight WT males  
673 were paired with *hsf5*<sup>-/-</sup> females and the transparent eggs from all were  
674 collected separately after 3 hpf to determine the survival rate at 24 hpf.

675

676

677 ***Histological and SEM analysis of gonads***

678 Male zebrafish were euthanized with tricaine methane sulfonate and their  
679 testicular tissues were fixed in 4% formaldehyde at 4°C overnight. After  
680 dehydration, samples were embedded in plastic resin (Leica). Serial cross-  
681 sections of 2 µm were cut by microtome (Leica), dried on slides at 42° C  
682 overnight, stained with haematoxylin and eosin, and then mounted in Permount  
683 (Fisher-Brand) and imaged with phase contrast microscope with a 63x and 100x  
684 oil objective lens. Four WT and *hsf5*<sup>-/-</sup> testis were used for morphometric  
685 analysis of germ cell types. Ten sections were chosen randomly for each sample  
686 and scored using high resolution light microscope (Leica) at a magnification of  
687 ×100. Staging of germ cells was performed as described previously (68), using  
688 collection of images explaining the histology and toxicological pathology of the  
689 zebrafish (69) as a reference. ImageJ thresholding was used to count the number  
690 of germ cells. Images with sectioning or staining artefacts were not selected for  
691 cell counting.

692 For Scanning Electron Microscopy (SEM), three wild type and mutant sperm  
693 specimens each were fixed using 2.5% glutaraldehyde, dehydrated in ascending  
694 graded ethanol (30%, 50%, 70%, 90% and 96% for 15 minutes in each) then

695 dropped onto a round glass slide and dried using a silica gel drier. After the  
696 surface was treated with electric conduction, the specimens were observed  
697 under a Jeol JSM-6360LV scanning electron microscope.

698 For Transmission Electron Microscopy (TEM), samples (n=3) were fixed with  
699 2.5% glutaraldehyde in 0.1 M phosphate buffer (pH 7.2), washed 3X in 0.1 M  
700 phosphate buffer (pH 7.2) for 15 minutes each dehydrated in graded series of  
701 alcohol (in water) for 15 minutes each, dried at critical point, mounted on  
702 specimen stub with silver paste, sputter coated with gold and imaged under a  
703 Jeol JEM-1230 Transmission Electron Microscope (Jeol, USA).

704

#### 705 ***Sperm quantification and TUNEL assay***

706 Sperm counts were determined by hemocytometry. Sperm suspension stock  
707 was generated by crushing the full testes of each individual in Fifty Microliter  
708 Hank's balanced salt solution. This stock from four WT and mutant individuals  
709 each was diluted 5000 times, and was loaded to fill the haemocytometer  
710 counting chamber. Sperm numbers were counted using light microscope at 20X  
711 magnification. Spermatozoa in four corner squares were counted from four  
712 replicates of the same individual sample and used for calculating the  
713 concentration.

714 TUNEL staining was performed on mutant and wildtype testis fixed in 4%  
715 paraformaldehyde, embedded in paraffin. Cross sections of 5  $\mu$ m were  
716 rehydrated and a commercial *in situ* cell- death detection kit (Roche diagnostics,  
717 Germany) was used for labelling the slides. Nonspecific protein binding sites  
718 were blocked by 30 mins incubation in blocking buffer containing 3 % BSA  
719 (Sigma) in 0.2 % Triton X in PBS. The sections were then incubated with  
720 antifluorescein antibody (Invitrogen) for 16 hrs at 4 °C at 1:400 dilution in PBS  
721 containing 1 % BSA and 0.1 % Triton X. Alexa Flour 488 anti-rabbit (Invitrogen)  
722 at 1:1000 dilutions were used as a secondary antibody for 2 hrs at RT followed  
723 by DAPI (Calbiochem) staining for 5 mins. The image was captured using SP8  
724 gSTED Confocal Laser Scanning Biological Microscope (Leica).

725

### 726 ***Transcriptome analysis and CHIP sequencing***

727 RNA was extracted from the intact testes of adult *hsf5*<sup>-/-</sup> and WT siblings (at five  
728 mpf of age) using an Ambion RNAqueous-micro kit (Life Technologies).  
729 Sequencing libraries were constructed using TruSeq RNA Library Prep Kit v2  
730 (Illumina) following the manufacturer's instructions and sequenced using Illumina  
731 Nextseq 500. The 150 bp paired-end reads generated were pre-processed  
732 using Cutadapt v.1.18 (70) and Trimmomatic v0.36 (71) to remove low quality  
733 reads. Mapping was performed on GRCz10 genome assembly using STAR

734 v2.5.3a (72). Differentially expressed genes were identified using Partek Flow  
735 software (Partek Inc). Genes with FDR values of less than 0.05 and average  
736 coverage of at least 5 were classified by GO (Gene Ontology) and KEGG (Kyoto  
737 Encyclopedia of Genes and Genomes) pathway analysis. Unclassified genes  
738 were annotated by referring to their orthologous genes in mammals.

739 An antibody was raised against the zebrafish Hsf5 protein by Agrisear AB (Vännäs,  
740 Sweden) against the C-terminal region (amino acids 407-420), which is not  
741 conserved among the Hsf5 orthologs in vertebrates. The specificity of the  
742 antibody to recognize native Hsf5 protein was demonstrated through Western  
743 blot and immunohistochemistry on zebrafish gonads. Chromatin  
744 Immunoprecipitation (ChIP) was performed using MAGnify™ Chromatin  
745 Immunoprecipitation System (Invitrogen) following the manufacturer's  
746 instructions. Library preparation was performed on 50 ng CHIP DNA using the  
747 Illumina ChIP-seq sample preparation kit (Illumina, USA) according to the  
748 manufacturer's protocol. The ChIP DNA library was sequenced on the Nextseq  
749 500 (Illumina, USA) with paired end, 150 bp reads.

750

751 **Statistical Analysis**



752 For qPCR data analysis, mean  $\pm$  standard deviation was calculated. Statistical  
753 differences in relative mRNA expression between experimental groups were  
754 assessed by 2 tailed Student's *t*-test. Differences were considered statistically  
755 significant at  $p < 0.05$ . \*,  $p < 0.05$ ; \*\*,  $p < 0.01$ ; \*\*\*,  $p < 0.001$ .

756 We used Kolmogorov-Smirnov test to compare the significance in the difference  
757 between the cell number and area at meiotic prophase-I.

758 Data: The transcriptomic and ChIP-seq data in the current study is submitted to  
759 NCBI SRA, with accession number [SRP124146](#)

760

#### 761 **Author contributions**

762 Conceived the study: LO, JMS, MHS,

763 Designed the experiments: JMS, AA, PEO, LO

764 Generated the mutants: JMS

765 Performed the experiments and/or analyzed the data: JMS, MHS, AP, WCL,

766 NMT

767 Discussed and interpreted the data: JMS, MSH, AP, WCL, NMT, AA, PEO, LO

768 Wrote and corrected the manuscript: JMS, AA, PEO, LO

769

#### 770 **Acknowledgements**

771 This research was supported by the National Research Foundation, Prime  
772 Minister's Office, Singapore under its Competitive Research Programme (Award  
773 No: NRF-CRP7-2010-001) and by internal research grants from Temasek Life  
774 Sciences Laboratory (for LO}, by fellowships from Temasek Life Sciences  
775 Laboratory and the Department of Biological Sciences of the National University  
776 of Singapore (for MSH) as well as by the Swedish Research Council, Knowledge  
777 Foundation, Sweden and Örebro University (for PEO).

778 The authors thank the following colleagues for their helpful technical advices:  
779 Norman Teo on CHIP experiment, Kellee Siegfried on histology, Toshihiro  
780 Kawasaki on the IHC procedure, Haiwei Song, Bharath SR and Xuhua Tang on  
781 analyses of protein domains. Sycp3 antibody was a kind gift from Noriyoshi  
782 Sakai.

783

784

785

786 **Figure legends**

787

788 **Fig. 1: The new heat shock factor (Hsf5) isolated from zebrafish can be**  
789 **found in members of all major vertebrate groups and lacks HR-A/B and HR-C**  
790 **domains.** A: Comparative view of the domain architecture of four vertebrate  
791 Hsf5s: *Danio* – zebrafish, *Xenopus* – frog, *Gallus* – chicken and *Homo* – human.  
792 DBD – DNA-binding domain; B: Phylogenetic analysis of vertebrate HSFs  
793 showed that all orthologs of the newly described zebrafish gene are located on  
794 a separate branch clearly apart from the rest of the other family members (HSF1-  
795 4). The tree was constructed with the neighbour-joining method based on the  
796 amino acid sequences; the confidence in phylogeny was assessed by bootstrap  
797 re-sampling of the data (1000X). Labels: hs - *Homo sapiens*, mm - *Mus musculus*,  
798 gg - *Gallus gallus*, xt - *Xenopus tropicalis*, om - *Oncorhynchus mykiss*, and dr -  
799 *Danio rerio* (GenBank IDs of all sequences used are shown in **S1A Table**). C:  
800 Schematic representation of the four members of zebrafish heat shock factor  
801 (Hsf) protein family for comparing the relative location of specific domains. HR-  
802 A/B – heptad repeat (A/B); HR-C - heptad repeat (C).

803

804 **Fig. 2: Three hsf5<sup>-/-</sup> mutant lines were generated by CRISPR/Cas9-**  
805 **based knockout.** A: Schematic representation of three mutant lines:

806 Hsf5<sup>sg40</sup> has a deletion of five bases and it introduces a stop codon after 121  
807 amino acids. Hsf5<sup>sg41</sup> and Hsf5<sup>sg42</sup> has a deletion of 7 bases and addition of 25  
808 bases and introduces the stop codon after 114 and 131 amino acids respectively  
809 and all three mutations are frame shift type resulting in truncated protein. B:  
810 Predicted amino acid sequence from three mutant lines.

811 **C:** Western blot confirms the efficiency of the CRISPR/Cas9 treatment.  
812 Knockdown of Hsf5 resulted in severe reduction of the protein level compared  
813 to WT. Adult testis from Hsf5<sup>sg40</sup> and Hsf5<sup>sg41</sup> and WT were used. Actin was used  
814 as an internal control.

815 **Fig. 3: Hsf5 protein showed similar localization pattern to a**  
816 **known spermatocyte marker Sycp3. A-D:** Immunohistochemistry was  
817 performed on sequential sections from the testis of WT adult zebrafish for Hsf5  
818 and Sycp3 and counterstained with DAPI. **E-F:** Hsf5 expression was  
819 undetectable Hsf5<sup>-/-</sup> testis (E) and was drastically low in WT ovary (F). **G:**  
820 Localization of Hsf5 protein (green) as granule like structures in the nucleus of  
821 primary spermatocytes, orthogonal views are presented to emphasize presence  
822 of foci in nucleus (red). H: Maximum-intensity Z-projection of images. Scale bars  
823 - A-D: 50  $\mu$ m, E: 400  $\mu$ m, F: 100  $\mu$ m, G and H: 5  $\mu$ m

824

825 **Fig. 4: Histological and EM-based analysis of testes and spermatozoa**  
826 **revealed severe reduction and defective shape of spermatozoa in *hsf5*<sup>-/-</sup>**  
827 **mutant compared to WT.** Histological analysis showed lumen filled with  
828 spermatozoa (SZ), are visible in the wild type (A), and fewer in the mutant (B). In  
829 the wild type (A), meiotic prophase stages were visible in few cells, whereas in  
830 the mutant (B), an over representation of primary spermatocyte (PS) was  
831 observed. C: Quantification of germ cells at different stages in WT and *hsf5*<sup>-/-</sup>  
832 testis. D: The sperm count determined by hemocytometer showed a severe  
833 reduction in the number of spermatozoa in *hsf5*<sup>-/-</sup> compared to WT. E-G:  
834 Representative germ cell stages, spermatogonia (spg), primary spermatocyte  
835 (ps) and spermatozoa (sz). H-K: Scanning electron micrograph (SEM) of WT (H, I)  
836 and *hsf5*<sup>-/-</sup> spermatozoa (J, K). Spermatozoa of the *hsf5*<sup>-/-</sup> mutant were clumped  
837 together with enlarged head and defective and shorter flagellum.

838

839 **Fig. 5: Transmission electron micrograph (TEM) showing abnormal head**  
840 **axoneme and filament of *hsf5*<sup>-/-</sup> mutant spermatozoa.** A-D: Sperm head from  
841 WT (A) and *hsf5*<sup>-/-</sup> (B-D) showed dislocated cytoplasmic membrane and intense  
842 vacuolization in mutants compared to WT. E-F: Cross-section through the central  
843 region of a wild type (E) and *hsf5*<sup>-/-</sup> mutant (F-H) sperm flagella showing the  
844 normal 9+2 organisation of the axoneme in WT and variability of the axoneme

845 structure in *hsf5*<sup>-/-</sup> with defects in central and peripheral duplets symmetry. I-J:  
846 Longitudinal section of wild type (I) and *hsf5*<sup>-/-</sup> mutant (J) flagella showing the  
847 defects of microtubules. K: Defects in head and microtubule arrangements in  
848 axonemes of wild type (WT) and *hsf5*<sup>-/-</sup> spermatozoa were quantified and are  
849 shown as percentages for each of the categories represented in the table

850

851 **Fig. 6: *hsf5*<sup>-/-</sup> mutant testes showed higher number of primary**  
852 **spermatocytes and apoptotic cells compared to WT.** A: WT testis  
853 stained with Sycp3. B: *hsf5*<sup>-/-</sup> mutant testis stained with Sycp3 showing higher  
854 number of cells stained by the primary spermatocyte marker. C-D: TUNEL  
855 staining of the wild type (C) and *hsf5*<sup>-/-</sup> (D) testis showing high numbers of  
856 apoptotic spermatocytes and spermatozoa in the latter. E: Spermatocytes at  
857 preleptotene stage of meiotic prophase 1 where Sycp3 appear as small particle  
858 at one side of cell. F: Spermatocytes at leptotene stage where Sycp3 has stained  
859 the bouquet shaped chromosomal arrangement. G: Spermatocytes at  
860 zygotene/pachytene stage where Sycp3 staining is in reticulate manner. H: The  
861 relative proportion of the above three stages quantified from Sycp3-stained WT  
862 and *hsf5*<sup>-/-</sup> mutant testis (n=3 each). Cell counts at the preleptotene stage were  
863 significantly lower in *hsf5*<sup>-/-</sup> mutant, whereas the leptotene and

864 zygotene/pachytene stages were highly represented in the *hsf5*<sup>-/-</sup> mutant in  
865 comparison to WT.

866

867 **Fig. 7: Transcriptome of the *hsf5*<sup>-/-</sup> zebrafish gonad is significantly different**  
868 **from that of WT.** A: PCA plot demonstrating the clustering of mutants further  
869 away from WT. B: Analysis of Hsf5 CHIPseq peak showed a wide distribution  
870 with significant number of peaks in intergenic region. C: Functional classification  
871 of Hsf5 peaks revealed the mapping of majority of peaks to protein coding  
872 genes. D: The intersect between RNAseq DEGs and CHIPseq gene sets showed  
873 that a significant number of DE genes were also *hsf5* targets. E: KEGG pathway  
874 analysis of gene intersect indicated the involvement of DNA repair pathways,  
875 meiosis and apoptosis in spermatogenesis.

876

877 **Supplementary Information**

878 **Supplementary Fig 2. Hsf5 does not play a role in heat shock response.**

879 A: Validation of Hsf5 antibody in testis showing manifold higher expression  
880 compared to ovary. B-C: Transcripts levels of *hsp70* in testis showed  
881 upregulation upon heat- shock in adults, whereas *hsf5* levels remained same  
882 after heat-shock. Transcript levels were normalized against *eef1a1a* reference  
883 gene. Each value represents the mean of n=3 +/- SD. \*  $p < 0.05$ ; \*\* $p < 0.01$ ; \*\*\*  
884  $p < 0.001$ , Student t-test.

885

886 **Supplementary Fig 3. *hsf5* expression was low during early embryonic  
887 development and among the organs tested testis showed the highest**

888 **expression.** A: Low expression levels from of *hsf5* detected from zygote to  
889 juvenile (21dpf) by q-PCR. **B:** Testis showed highest expression level compared  
890 to other organs (*eef1a111* was used as a reference gene; n=3). Transcript levels  
891 were normalized against *eef1a1a* reference gene. Each value represents the  
892 mean of n=3 +/- SD. \*  $p < 0.05$ ; \*\* $p < 0.01$ ; \*\*\*  $p < 0.001$ , Student t-test.

893

894 **Supplementary Fig 4. *hsf5* is a late testis marker in zebrafish.** The

895 expression level of *amh* (A), *nr5a1a* (B) *cyp19a1a* (C) and *hsf5* (D) in both sexes  
896 during the gonad differentiation period (20-40 dpf) in zebrafish. Zebrafish



897 transgenic to the Tg(*ddx4:ddx4-egfp*) *zf45* construct were sorted according to  
898 their gonadal Egfp signal: no signal – male; strong signal – female. RNA was  
899 isolated from isolated gonads (20-40 dpf). Transcript levels were normalized  
900 against *rpl13* reference gene. Each value represents the mean of n=3 +/- SD.

901

902 **Supplementary Fig 5. Comparison of two *hsf5* transcript variants in**  
903 **zebrafish testis.** A: RT-PCR using *hsf5* full length (*Hsf5* FL) primer detected two  
904 transcript variants of *hsf5* in testis, whereas the ovary showed only the longer  
905 transcript variant. B: Comparative sequence analysis of the two transcript  
906 variants, *hsf5\_tv1* and *hsf5\_tv2*, showed that the testis-specific one (*hsf5\_tv2*)  
907 was shorter due to the absence of the third exon. Red color arrows indicate the  
908 binding sites of primers used for PCR amplification

909

910

911 **Supplementary Fig 6. Efficient germline transmission was observed in F1**  
912 **generation.** Cross between mosaic F0 males and females with WT yielded A)  
913 21 to 69% germline transmission to F1. B-D: Fluorescent genotypes of B) Wild  
914 Type; C) *hsf5*<sup>+/+</sup> and D) *hsf5*<sup>-/-</sup>

915

916 **Supplementary Fig 7. Hsf5 loss of function resulted in male infertility.**

917 Embryo phenotypes for wild type (A,B) and *hsf5*<sup>-/-</sup>(C,D) at 6 (left) and 24 hours  
918 post-fertilization (hpf; right).

919

920 **Supplementary Fig 8. The surface area of mutant cells was higher than**

921 **that of WT at meiotic prophase stages.** A-C: Pre-leptotene, leptotene and

922 zygotene/pachytene stages showed significantly higher surface area in *hsf5*<sup>-/-</sup>

923 mutant compared to WT. WT and *hsf5*<sup>-/-</sup> mutant testis stained with Sycp3 were

924 used for surface area analysis (n=3).

925 **Supplementary Fig 9. The position of the gRNA targeting site in the**

926 **second exon of the zebrafish *hsf5* locus.** The target site sequence is indicated

927 in red, whereas the protospacer adjacent motif (PAM) is shown in green. Primer

928 binding sites are in blue.

929

930 **Supplementary Fig 10. T7 E1 Assay on F0 founder A) males and B)**

931 **females showed different rates of mutation (17-54%).**  $\text{Indel \%} = 100 \times (1 - \sqrt[1-f_{\text{cut}}]{1 - f_{\text{cut}}})$

932

933

934 **Supplementary Fig 11. Mutations generated by engineered gRNA/Cas9**

935 **at *hsf5* site in four injected founder individuals.** The wild type sequence is

936 shown at the top. Target sites are blue and the PAM sequence is red and  
937 underlined. Deletions are shown as red dashes and insertions blue highlight.  
938 (Labels on the right: +: insertion; -: deletion).

939 **Supplementary Table 1A:** The complete list of zebrafish genes analyzed in this  
940 study

941

942 **Supplementary Table 1B:** The complete list of primer sequences used for PCR-  
943 amplifications

944

945 **Supplementary Table 1C:** Vertebrate Hsf orthologs used to generate the  
946 phylogenetic tree in Figure 2.

947

948 **Supplementary Table 1D:** Percentage of amino acid identity of Hsf5 protein  
949 and functional domain between zebrafish and other species

950

951 **Supplementary Table 1E:** The complete list of differentially expressed genes  
952 from RNA seq

953

954 **Supplementary Table 1F:** GO analysis of differentially expressed genes

955

956 **Supplementary Table 1G:** KEGG pathway analysis of differentially expressed

957 genes

958

959 **Supplementary Table 1H:** ChIP-seq peaks for Hsf5

960

961 **Supplementary Table 1I:** Gene list for RNAseq and CHIP seq intersect ( $p$ -value

962  $<0.05$  and 4 fold or higher enrichment of peak)

963

964 **Supplementary Table 1J:** KEGG pathway analysis of genes from RNAseq and

965 CHIPseq intersect.

966

## 967 **References**

- 968 1. Morange M. HSFs in development. Handbook of experimental pharmacology.  
969 2006(172):153-169.
- 970 2. Pirkkala L, Nykanen P, Sistonen L. Roles of the heat shock transcription factors  
971 in regulation of the heat shock response and beyond. FASEB J. 2001;15(7):1118-1131.
- 972 3. Benjamin IJ, McMillan DR. Stress (heat shock) proteins: molecular chaperones in  
973 cardiovascular biology and disease. Circulation research. 1998;83(2):117-132.
- 974 4. Polla BS, Cossarizza A. Stress proteins in inflammation. Exs. 1996;77:375-391.
- 975 5. Leppa S, Sistonen L. Heat shock response--pathophysiological implications.  
976 Annals of medicine. 1997;29(1):73-78.
- 977 6. Fujimoto M, Nakai A. The heat shock factor family and adaptation to proteotoxic  
978 stress. Febs Journal. 2010;277(20):4112-4125.
- 979 7. Nakai A. New aspects in the vertebrate heat shock factor system: Hsf3 and Hsf4.  
980 Cell Stress Chaperones. 1999;4(2):86-93.
- 981 8. Caruccio L, Bae S, Liu AY, Chen KY. The heat-shock transcription factor HSF1  
982 is rapidly activated by either hyper- or hypo-osmotic stress in mammalian cells. Biochem  
983 J. 1997;327 ( Pt 2):341-347.
- 984 9. Kawazoe Y, Tanabe M, Sasai N, Nagata K, Nakai A. HSF3 is a major heat shock  
985 responsive factor during chicken embryonic development. Eur J Biochem.  
986 1999;265(2):688-697.
- 987 10. Sarge KD. Regulation of HSF1 activation and Hsp expression in mouse tissues  
988 under physiological stress conditions. Stress of Life. Annals of the New York Academy  
989 of Sciences. 8511998. p. 112-116.
- 990 11. Sarge KD, Murphy SP, Morimoto RI. Activation of heat shock gene transcription  
991 by heat shock factor 1 involves oligomerization, acquisition of DNA-binding activity,  
992 and nuclear localization and can occur in the absence of stress. Mol Cell Biol.  
993 1993;13(3):1392-1407.
- 994 12. Xiao X, Zuo X, Davis AA, McMillan DR, Curry BB, Richardson JA, et al. HSF1  
995 is required for extra-embryonic development, postnatal growth and protection during  
996 inflammatory responses in mice. EMBO J. 1999;18(21):5943-5952.
- 997 13. Wirth D, Christians E, Li X, Benjamin IJ, Gustin P. Use of Hsf1(-/-) mice reveals  
998 an essential role for HSF1 to protect lung against cadmium-induced injury. Toxicology  
999 and applied pharmacology. 2003;192(1):12-20.
- 1000 14. Wang GH, Zhang J, Moskophidis D, Mivechi NF. Targeted disruption of the heat  
1001 shock transcription factor (hsf)-2 gene results in increased embryonic lethality, neuronal  
1002 defects, and reduced spermatogenesis. Genesis. 2003;36(1):48-61.
- 1003 15. Somasundaram T, Bhat SP. Developmentally dictated expression of heat shock  
1004 factors: exclusive expression of HSF4 in the postnatal lens and its specific interaction  
1005 with alphaB-crystallin heat shock promoter. J Biol Chem. 2004;279(43):44497-44503.
- 1006 16. Chalmel F, Lardenois A, Evrard B, Mathieu R, Feig C, Demougin P, et al. Global  
1007 human tissue profiling and protein network analysis reveals distinct levels of

- 1008 transcriptional germline-specificity and identifies target genes for male infertility. Human  
1009 reproduction. 2012;27(11):3233-3248.
- 1010 17. Jedlicka P, Mortin MA, Wu C. Multiple functions of *Drosophila* heat shock  
1011 transcription factor in vivo. EMBO J. 1997;16(9):2452-2462.
- 1012 18. Dahm R, Geisler R. Learning from small fry: the zebrafish as a genetic model  
1013 organism for aquaculture fish species. Mar Biotechnol. 2006;8(4):329-345.
- 1014 19. Dodd A, Curtis PM, Williams LC, Love DA. Zebrafish: bridging the gap between  
1015 development and disease. Hum Mol Genet. 2000;9(16):2443-2449.
- 1016 20. Kimmel CB. Genetics and early development of zebrafish. Trends Genet.  
1017 1989;5(8):283-288.
- 1018 21. Swan CL, Evans TG, Sylvain N, Krone PH. Zebrafish HSF4: a novel protein that  
1019 shares features of both HSF1 and HSF4 of mammals. Cell Stress and Chaperones.  
1020 2012;17(5):623-637.
- 1021 22. Yeh FL, Hsu LY, Lin BA, Chen CF, Li IC, Tsai SH, et al. Cloning of zebrafish  
1022 (*Danio rerio*) heat shock factor 2 (HSF2) and similar patterns of HSF2 and HSF1 mRNA  
1023 expression in brain tissues. Biochimie. 2006;88(12):1983-1988.
- 1024 23. Li Y, Chia JM, Bartfai R, Christoffels A, Yue GH, Ding K, et al. Comparative  
1025 analysis of the testis and ovary transcriptomes in zebrafish by combining experimental  
1026 and computational tools. Comp Funct Genomics. 2004;5(5):403-418.
- 1027 24. Santos EM, Paull GC, Van Look KJW, Workman VL, Holt WV, Van Aerle R, et  
1028 al. Gonadal transcriptome responses and physiological consequences of exposure to  
1029 oestrogen in breeding zebrafish (*Danio rerio*). Aquatic toxicology. 2007;83(2):134-142.
- 1030 25. Sreenivasan R, Cai M, Wang XG, Bartfai R, Christoffels A, Orban L.  
1031 Transcriptomic analyses reveal novel genes with sexually dimorphic expression in the  
1032 zebrafish gonad and brain. PLoS ONE. 2008;3:e1791.
- 1033 26. Ran FA, Hsu PD, Wright J, Agarwala V, Scott DA, Zhang F. Genome  
1034 engineering using the CRISPR-Cas9 system. Nat Protocols. 2013;8(11):2281-2308.
- 1035 27. Rabergh CM, Airaksinen S, Soitamo A, Bjorklund HV, Johansson T, Nikinmaa  
1036 M, et al. Tissue-specific expression of zebrafish (*Danio rerio*) heat shock factor 1  
1037 mRNAs in response to heat stress. J Exp Biol. 2000;203(Pt 12):1817-1824.
- 1038 28. Hossain MS. Molecular analyses of gonad differentiation and function in  
1039 zebrafish. PhD. Thesis, NUS, Singapore. 2010.
- 1040 29. Wang XG, Orban L. Anti-Mullerian hormone and 11 beta-hydroxylase show  
1041 reciprocal expression to that of aromatase in the transforming gonad of zebrafish males.  
1042 Developmental dynamics : an official publication of the American Association of  
1043 Anatomists. 2007;236(5):1329-1338.
- 1044 30. Loreng TD, Smith EF. The central apparatus of cilia and eukaryotic flagella. Cold  
1045 Spring Harb Perspect Biol. 2017;9(2).
- 1046 31. Ozaki Y, Saito K, Shinya M, Kawasaki T, Sakai N. Evaluation of Sycp3, Plzf and  
1047 Cyclin B3 expression and suitability as spermatogonia and spermatocyte markers in  
1048 zebrafish. Gene expression patterns : GEP. 2011;11(5-6):309-315.
- 1049 32. Saito K, Siegfried KR, Nusslein-Volhard C, Sakai N. Isolation and cytogenetic  
1050 characterization of zebrafish meiotic prophase I mutants. Developmental dynamics : an  
1051 official publication of the American Association of Anatomists. 2011;240(7):1779-1792.

- 1052 33. Hydbring P, Malumbres M, Sicinski P. Non-canonical functions of cell cycle  
1053 cyclins and cyclin-dependent kinases. *Nature reviews Molecular cell biology*.  
1054 2016;17(5):280-292.
- 1055 34. Lim S, Kaldis P. Cdks, cyclins and CKIs: roles beyond cell cycle regulation.  
1056 *Development*. 2013;140(15):3079-3093.
- 1057 35. Akerfelt M, Vihervaara A, Laiho A, Conter A, Christians ES, Sistonen L, et al.  
1058 Heat shock transcription factor 1 localizes to the sex chromatin during meiotic repression.  
1059 *J Biol Chem*. 2010.
- 1060 36. Ji Z-L, Duan Y-G, Mou L-S, Allam J-P, Haidl G, Cai Z-M. Association of heat  
1061 shock proteins, heat shock factors and male infertility. *Asian Pacific Journal of*  
1062 *Reproduction*. 2012;1(1):76-84.
- 1063 37. Wang GH, Ying ZK, Jin XJ, Tu NX, Zhang Y, Phillips M, et al. Essential  
1064 requirement for both hsf1 and hsf2 transcriptional activity in spermatogenesis and male  
1065 fertility. *Genesis*. 2004;38(2):66-80.
- 1066 38. Braun RE, Behringer RR, Peschon JJ, Brinster RL, Palmiter RD. Genetically  
1067 haploid spermatids are phenotypically diploid. *Nature*. 1989;337(6205):373-376.
- 1068 39. Ruwanpura SM, McLachlan RI, Meachem SJ. Hormonal regulation of male germ  
1069 cell development. *J Endocrinol*. 2010;205(2):117-131.
- 1070 40. Huszar JM, Jia Y, Reddy JK, Payne CJ. Med1 regulates meiotic progression  
1071 during spermatogenesis in mice. *Reproduction*. 2015;149(6):597-604.
- 1072 41. Panigrahi SK, Manterola M, Wolgemuth DJ. Meiotic failure in cyclin A1-  
1073 deficient mouse spermatocytes triggers apoptosis through intrinsic and extrinsic signaling  
1074 pathways and 14-3-3 proteins. *PLoS One*. 2017;12(3):e0173926.
- 1075 42. Yu Q, Wu J. Involvement of cyclins in mammalian spermatogenesis. *Mol Cell*  
1076 *Biochem*. 2008;315(1-2):17-24.
- 1077 43. Refik-Rogers J, Manova K, Koff A. Misexpression of cyclin B3 leads to aberrant  
1078 spermatogenesis. *Cell Cycle*. 2006;5(17):1966-1973.
- 1079 44. Harada M, Benito J, Yamamoto S, Kaur S, Arslan D, Ramirez S, et al. The novel  
1080 combination of dual mTOR inhibitor AZD2014 and pan-PIM inhibitor AZD1208 inhibits  
1081 growth in acute myeloid leukemia via HSF pathway suppression. *Oncotarget*.  
1082 2015;6(35):37930-37947.
- 1083 45. Mukherjee S, Ridgeway AD, Lamb DJ. DNA mismatch repair and infertility.  
1084 *Current opinion in urology*. 2010;20(6):525-532.
- 1085 46. Kistler WS, Baas D, Lemeille S, Paschaki M, Seguin-Estevez Q, Barras E, et al.  
1086 RFX2 Is a Major Transcriptional Regulator of Spermiogenesis. *PLoS genetics*.  
1087 2015;11(7):e1005368.
- 1088 47. Piasecki BP, Burghoorn J, Swoboda P. Regulatory Factor X (RFX)-mediated  
1089 transcriptional rewiring of ciliary genes in animals. *Proc Natl Acad Sci U S A*.  
1090 2010;107(29):12969-12974.
- 1091 48. Borgers M, Wolter M, Hentrich A, Bergmann M, Stammeler A, Konrad L. Role of  
1092 compensatory meiosis mechanisms in human spermatogenesis. *Reproduction*.  
1093 2014;148(3):315-320.
- 1094 49. Inaba K, Mizuno K. Sperm dysfunction and ciliopathy. *Reproductive Medicine*  
1095 *and Biology*. 2016;15(2):77-94.
- 1096 50. Zhang YJ, O'Neal WK, Randell SH, Blackburn K, Moyer MB, Boucher RC, et al.  
1097 Identification of dynein heavy chain 7 as an inner arm component of human cilia that is



- 1098 synthesized but not assembled in a case of primary ciliary dyskinesia. *J Biol Chem.*  
1099 2002;277(20):17906-17915.
- 1100 51. Zietkiewicz E, Nitka B, Voelkel K, Skrzypczak U, Bukowy Z, Rutkiewicz E, et  
1101 al. Population specificity of the DNAI1 gene mutation spectrum in primary ciliary  
1102 dyskinesia (PCD). *Respiratory research.* 2010;11:174.
- 1103 52. Allan CM. RABL-regulated pathways: a new tale in sperm function. *Asian*  
1104 *journal of andrology.* 2013;15(1):87-88.
- 1105 53. Baker SA, Freeman K, Luby-Phelps K, Pazour GJ, Besharse JC. IFT20 links  
1106 kinesin II with a mammalian intraflagellar transport complex that is conserved in motile  
1107 flagella and sensory cilia. *J Biol Chem.* 2003;278(36):34211-34218.
- 1108 54. Teves ME, Sears PR, Li W, Zhang Z, Tang W, van Reesema L, et al. Sperm-  
1109 associated antigen 6 (SPAG6) deficiency and defects in ciliogenesis and cilia function:  
1110 polarity, density, and beat. *PLoS One.* 2014;9(10):e107271.
- 1111 55. van Rooijen E, Giles RH, Voest EE, van Rooijen C, Schulte-Merker S, van Eeden  
1112 FJ. LRRC50, a conserved ciliary protein implicated in polycystic kidney disease. *Journal*  
1113 *of the American Society of Nephrology : JASN.* 2008;19(6):1128-1138.
- 1114 56. Duquesnoy P, Escudier E, Vincensini L, Freshour J, Bridoux AM, Coste A, et al.  
1115 Loss-of-function mutations in the human ortholog of *Chlamydomonas reinhardtii* ODA7  
1116 disrupt dynein arm assembly and cause primary ciliary dyskinesia. *American journal of*  
1117 *human genetics.* 2009;85(6):890-896.
- 1118 57. Loges NT, Olbrich H, Becker-Heck A, Haffner K, Heer A, Reinhard C, et al.  
1119 Deletions and point mutations of LRRC50 cause primary ciliary dyskinesia due to dynein  
1120 arm defects. *American journal of human genetics.* 2009;85(6):883-889.
- 1121 58. Omran H, Kobayashi D, Olbrich H, Tsukahara T, Loges NT, Hagiwara H, et al.  
1122 Ktu/PF13 is required for cytoplasmic pre-assembly of axonemal dyneins. *Nature.*  
1123 2008;456(7222):611-616.
- 1124 59. Cotto J, Fox S, Morimoto R. HSF1 granules: a novel stress-induced nuclear  
1125 compartment of human cells. *J Cell Sci.* 1997;110 ( Pt 23):2925-2934.
- 1126 60. Alastalo TP, Hellesuo M, Sandqvist A, Hietakangas V, Kallio M, Sistonen L.  
1127 Formation of nuclear stress granules involves HSF2 and coincides with the nucleolar  
1128 localization of Hsp70. *J Cell Sci.* 2003;116(Pt 17):3557-3570.
- 1129 61. Westerfield M. The zebrafish book. A guide for the laboratory use of zebrafish  
1130 (*Danio rerio*). Eugene: University of Oregon Press; 1995. 1.1-11.65 p.
- 1131 62. Sievers F, Wilm A, Dineen D, Gibson TJ, Karplus K, Li W, et al. Fast, scalable  
1132 generation of high-quality protein multiple sequence alignments using Clustal Omega.  
1133 *Mol Syst Biol.* 2011;7.
- 1134 63. Tamura K, Peterson D, Peterson N, Stecher G, Nei M, Kumar S. MEGA5:  
1135 Molecular Evolutionary Genetics Analysis Using Maximum Likelihood, Evolutionary  
1136 Distance, and Maximum Parsimony Methods. *Molecular Biology and Evolution.*  
1137 2011;28(10):2731-2739.
- 1138 64. Alastalo TP, Lonnstrom M, Leppa S, Kaarniranta K, Pelto-Huikko M, Sistonen L,  
1139 et al. Stage-specific expression and cellular localization of the heat shock factor 2  
1140 isoforms in the rat seminiferous epithelium. *Experimental Cell Research.*  
1141 1998;240(1):16-27.



- 1142 65. Wang XG, Bartfai R, Sleptsova-Freidrich I, Orban L. The timing and extent of  
1143 'juvenile ovary' phase are highly variable during zebrafish testis differentiation. *Journal of*  
1144 *Fish Biology*. 2007;70 (sa):33–44.
- 1145 66. Zhao C, Fernald A. Comprehensive algorithm for quantitative real-time  
1146 polymerase chain reaction. *J Comput Biol*. 2005;12:1047-1064.
- 1147 67. Ran FA, Hsu PD, Wright J, Agarwala V, Scott DA, Zhang F. Genome  
1148 engineering using the CRISPR-Cas9 system. *Nat Protoc*. 2013;8(11):2281-2308.
- 1149 68. Leal MC, Cardoso ER, Nobrega RH, Batlouni SR, Bogerd J, Franca LR, et al.  
1150 Histological and stereological evaluation of zebrafish (*Danio rerio*) spermatogenesis with  
1151 an emphasis on spermatogonial generations. *Biol Reprod*. 2009;81(1):177-187.
- 1152 69. van der Ven L. *Histology and Histopathology Atlas of the Zebrafish V2.01*  
1153 <https://zfishtoxpat.000webhostapp.com/tesgen.html2017> [cited 2017 21 Mar 2017].  
1154 V2.01:[]
- 1155 70. Martin M. Cutadapt removes adapter sequences from high-throughput sequencing  
1156 reads. *EMBnetjournal*. 2011;17(1):10-12.
- 1157 71. Bolger AM, Lohse M, Usadel B. Trimmomatic: a flexible trimmer for Illumina  
1158 sequence data. *Bioinformatics*. 2014;30(15):2114-2120.
- 1159 72. Dobin A, Davis CA, Schlesinger F, Drenkow J, Zaleski C, Jha S, et al. STAR:  
1160 ultrafast universal RNA-seq aligner. *Bioinformatics*. 2013;29(1):15-21.  
1161

1162

A

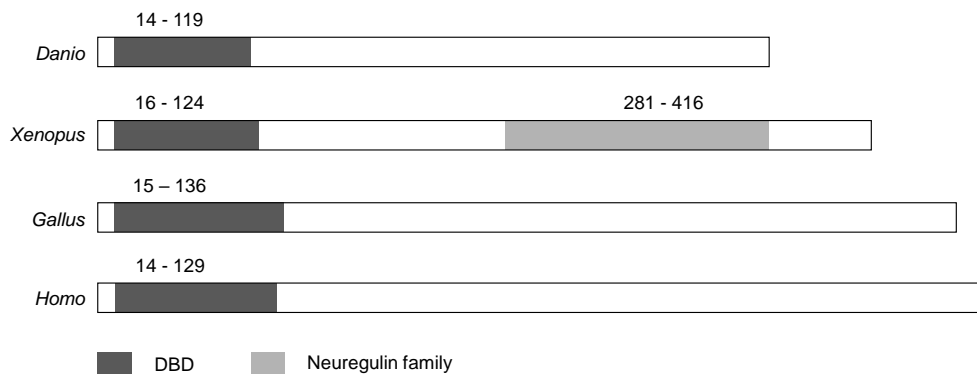

C

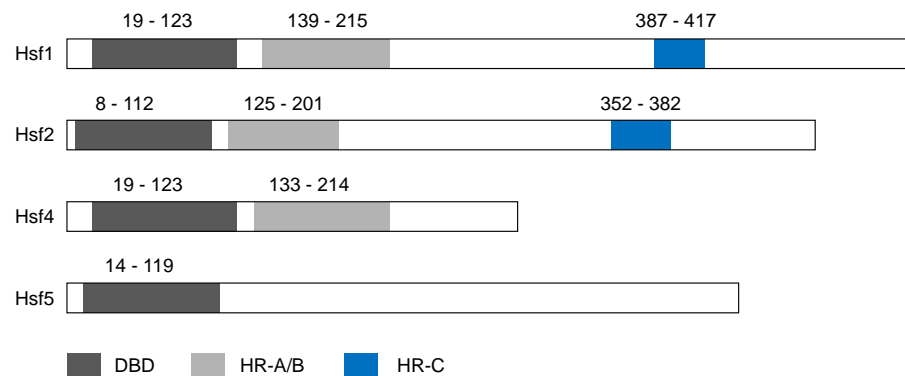

B

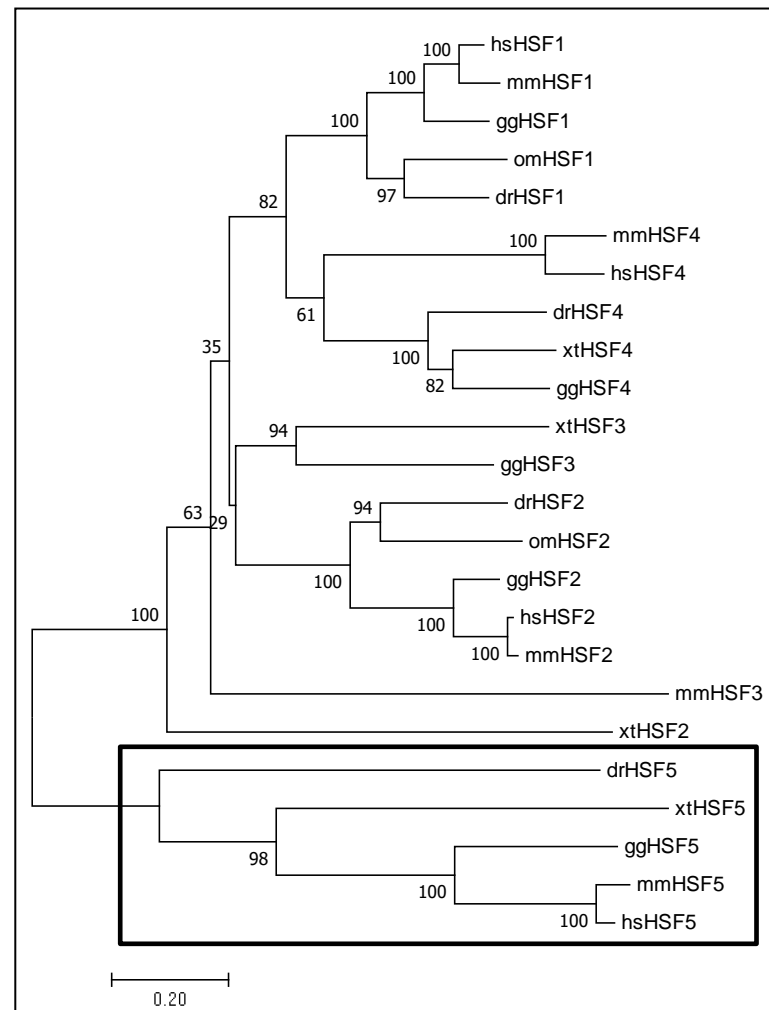

A

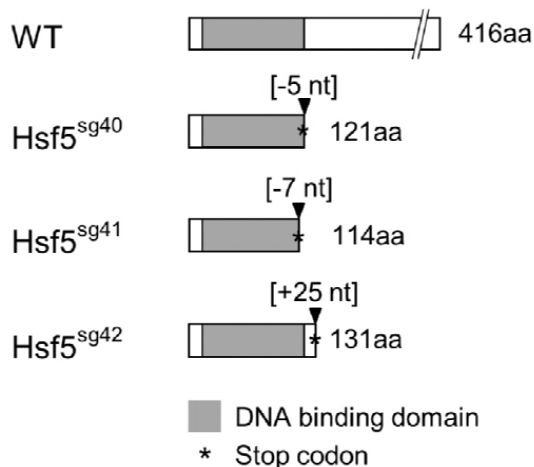

C

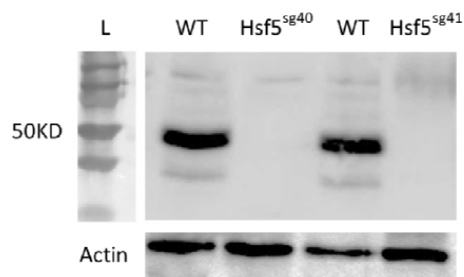

B

|                      |                                                               |     |
|----------------------|---------------------------------------------------------------|-----|
| WT                   | MAMDCDYSLNIVNIINYHNFPAKLWRLTNNPQNSSVFWSPGTGELIVDQQQFEVDLLTPIK | 60  |
| Hsf5 <sup>sg40</sup> | MAMDCDYSLNIVNIINYHNFPAKLWRLTNNPQNSSVFWSPGTGELIVDQQQFEVDLLTPIK | 60  |
| Hsf5 <sup>sg41</sup> | MAMDCDYSLNIVNIINYHNFPAKLWRLTNNPQNSSVFWSPGTGELIVDQQQFEVDLLTPIK | 60  |
| Hsf5 <sup>sg42</sup> | MAMDCDYSLNIVNIINYHNFPAKLWRLTNNPQNSSVFWSPGTGELIVDQQQFEVDLLTPIK | 60  |
|                      | *****                                                         |     |
| WT                   | LDNKPFKTSNFTSFIRQLNLYGFKKIFDGSPRDKHRNRHHFYNPFRRGQPELLVHLKRL   | 120 |
| Hsf5 <sup>sg40</sup> | LDNKPFKTSNFTSFIRQLNLYGFKKIFDGSPRDKHRNRHHFYNPFR-----RPTR       | 110 |
| Hsf5 <sup>sg41</sup> | LDNKPFKTSNFTSFIRQLNLYGFKKIFDGSPRDKHRNRHHFYNPNEANQSFWSI*RG*HS  | 118 |
| Hsf5 <sup>sg42</sup> | LDNKPFKTSNFTSFIRQLNLYGFKKIFDGSPRDKHRNRHHFYNPNGIISTIPTSIPTRPTR | 120 |
|                      | *****                                                         |     |
| WT                   | TLSKTKTKIGEK-----ESCRPLSRGQQKTQRNPAEENRGSAQLSGGAHQQPEY        | 171 |
| Hsf5 <sup>sg40</sup> | A--SGPSEEDTQ--*KDQDQDWREGKLSSTEPRTAENSTQPCRR*RFPCALRRCSPSA    | 164 |
| Hsf5 <sup>sg41</sup> | V--KRPRPRLERRKAVVH*AEDS--RKLNATLQKRIE--VLPSSQEV--QPISSQSMK    | 168 |
| Hsf5 <sup>sg42</sup> | A--SGPSEEDTQ--*KDQDQDWREGKLSSTEPRTAENSTQPCRR*RFPCALRRCSPSA    | 174 |
|                      | . . . . . * . . . . .                                         |     |

DAPI/Hsf5

DAPI/Sycp3

DAPI/Hsf5

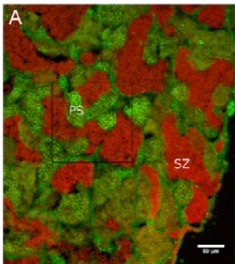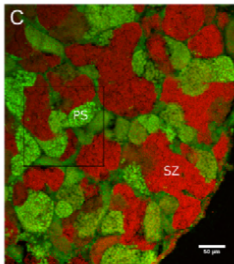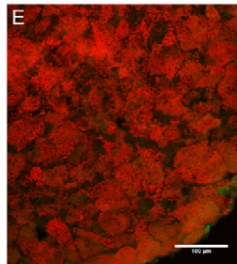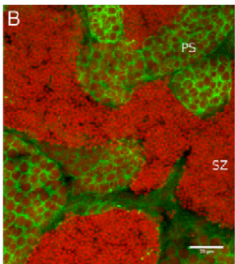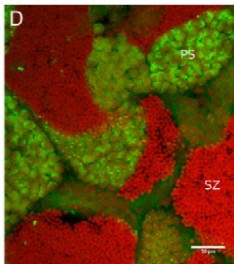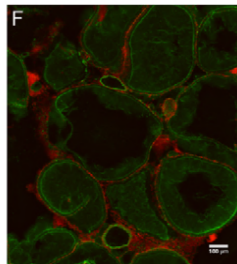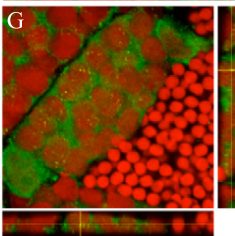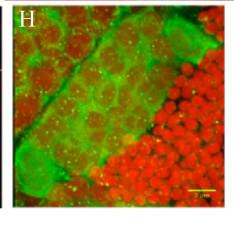Hsf5<sup>-/-</sup> Testis

WT Ovary

WT Testis

WT

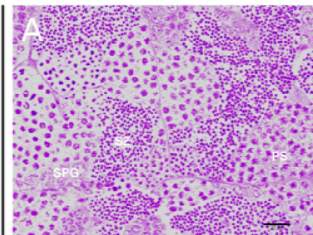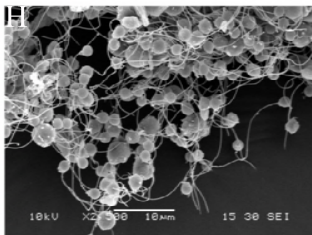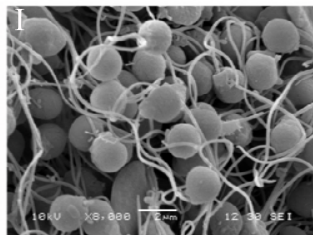*hsf5*<sup>-/-</sup>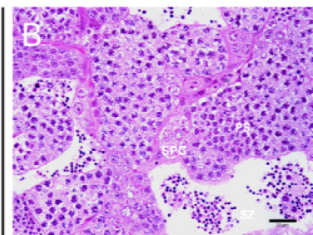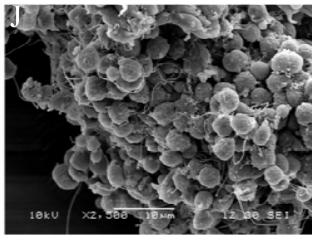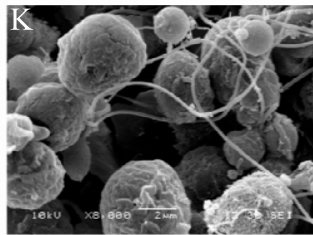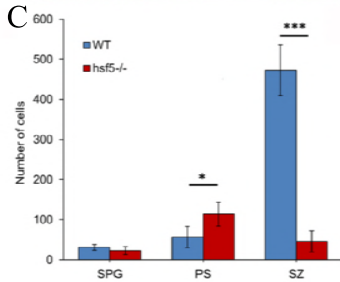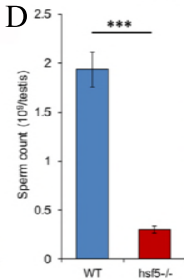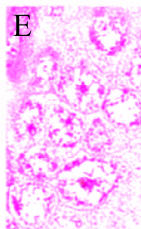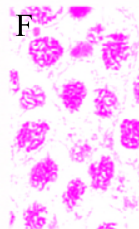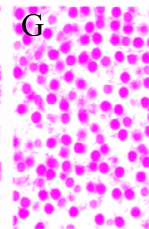

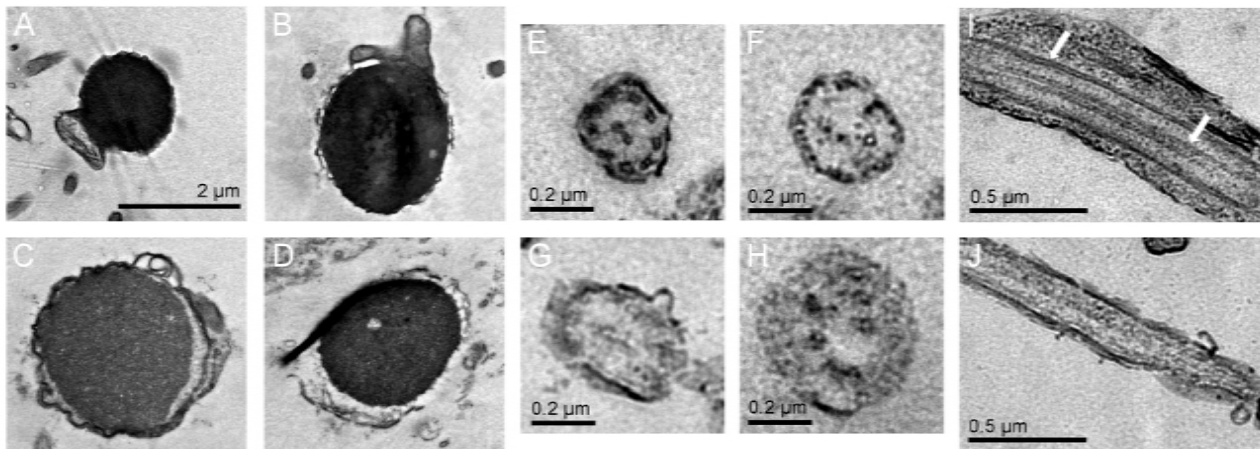

**K**

| Phenotype                  | Head   |          | Axoneme |           |
|----------------------------|--------|----------|---------|-----------|
|                            | Normal | Abnormal | 9+2     | Irregular |
| WT                         | 80     | 20       | 91      | 9         |
| <i>hsf5</i> <sup>-/-</sup> | 9      | 91       | 15      | 85        |



DAPI/Sycp3

DAPI/fluorescein

DAPI/Sycp3

WT

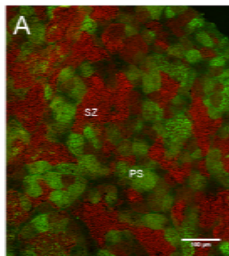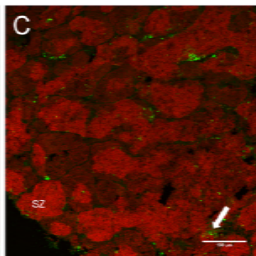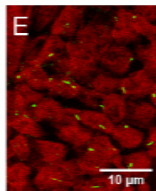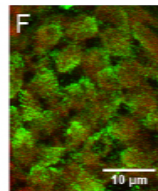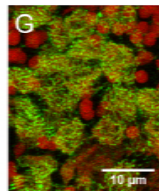

Preleptotene

Leptotene

Zygotene/  
pachytene

H

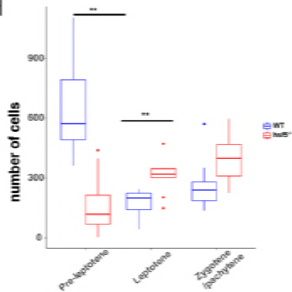 $hsf5^{-/-}$ 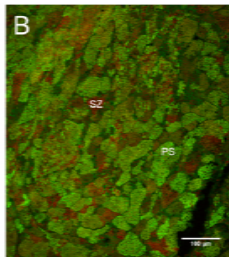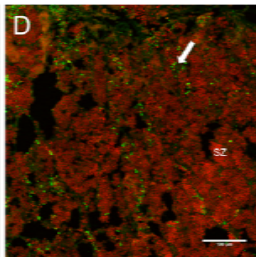

A

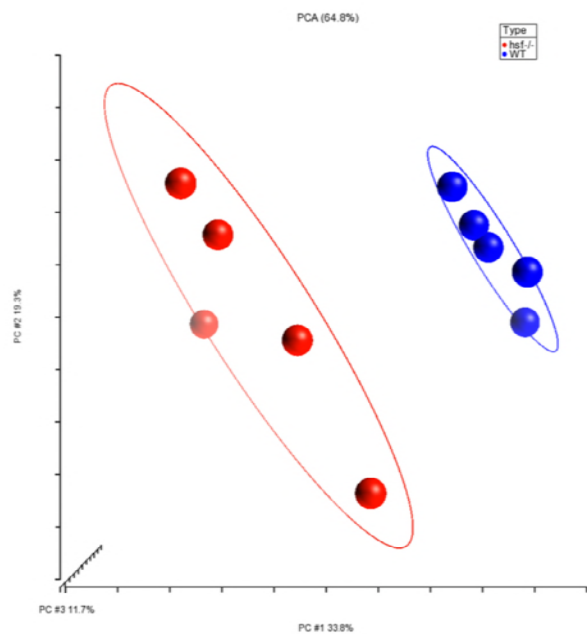

D

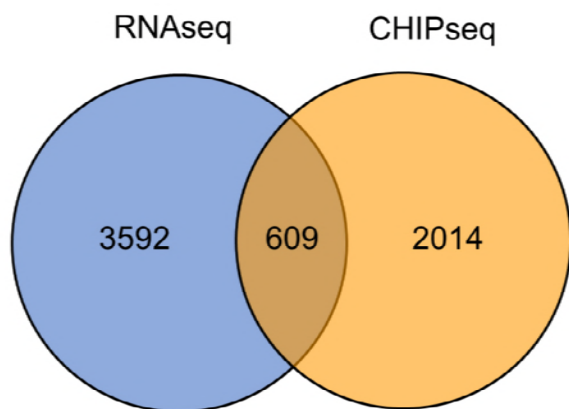

B

### Distribution of Hsf5 peaks in CHIPseq

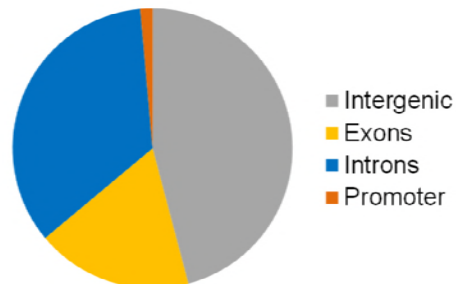

C

### Functional classification of Hsf5 peaks in CHIPseq

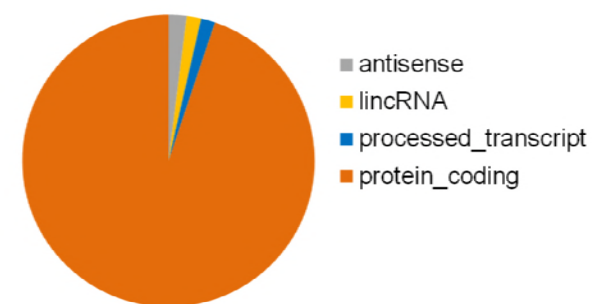

E

### KEGG Pathways of genes from RNAseq and CHIPseq intersect

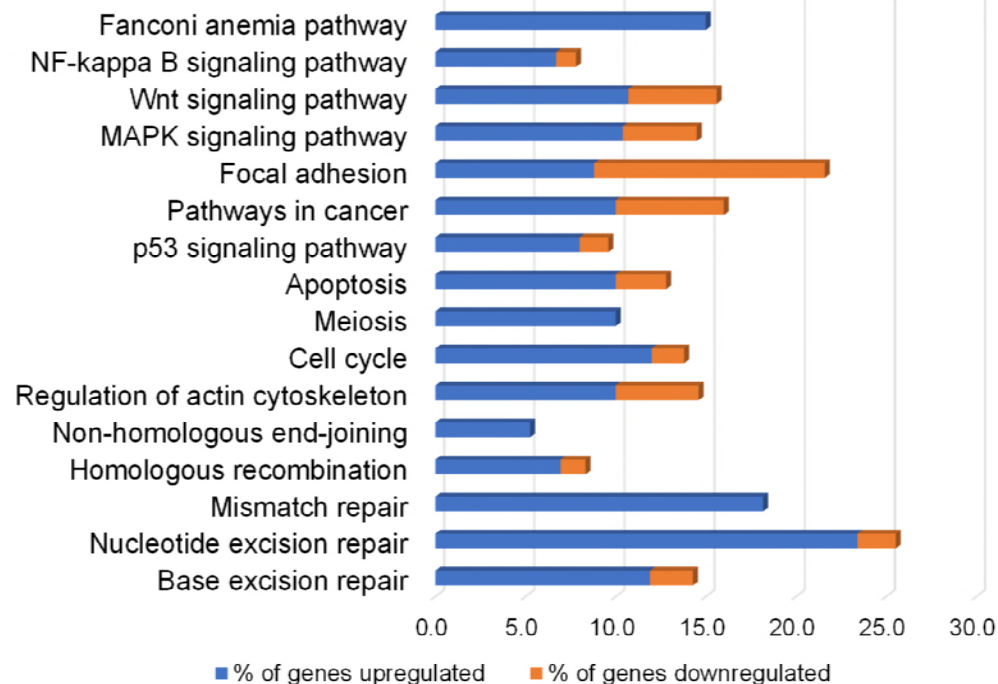

Source: https://www.biorxiv.org/content/10.1101/254615v1.full.pdf
